# Supplementary material for: Patterns of routine primary care for osteoarthritis in the UK: a cross-sectional electronic health records study
Source: PubMed Central journal article supplement (PMC5778330; doi:10.1136/bmjopen-2017-019694), 2017-12-29
Supplement: bmjopen-2017-019694.draft_revisions.pdf [file bmjopen-2017-019694.draft_revisions.pdf]

# BMJ Open

BMJ Open is committed to open peer review. As part of this commitment we make the peer review history of every article we publish publicly available.

When an article is published we post the peer reviewers' comments and the authors' responses online. We also post the versions of the paper that were used during peer review. These are the versions that the peer review comments apply to.

The versions of the paper that follow are the versions that were submitted during the peer review process. They are not the versions of record or the final published versions. They should not be cited or distributed as the published version of this manuscript.

BMJ Open is an open access journal and the full, final, typeset and author-corrected version of record of the manuscript is available on our site with no access controls, subscription charges or pay-per-view fees (<http://bmjopen.bmj.com>).

If you have any questions on BMJ Open's open peer review process please email [editorial.bmjopen@bmj.com](mailto:editorial.bmjopen@bmj.com)

# BMJ Open

## Patterns of routine primary care for osteoarthritis: a cross-sectional electronic health records study

|                                 |                                                                                                                                                                                                                                                                                                                                                                                                                                                                                                                                                                                                                                                                                                                                                                                                                                                                                                        |
|---------------------------------|--------------------------------------------------------------------------------------------------------------------------------------------------------------------------------------------------------------------------------------------------------------------------------------------------------------------------------------------------------------------------------------------------------------------------------------------------------------------------------------------------------------------------------------------------------------------------------------------------------------------------------------------------------------------------------------------------------------------------------------------------------------------------------------------------------------------------------------------------------------------------------------------------------|
| Journal:                        | <i>BMJ Open</i>                                                                                                                                                                                                                                                                                                                                                                                                                                                                                                                                                                                                                                                                                                                                                                                                                                                                                        |
| Manuscript ID                   | bmjopen-2017-019694                                                                                                                                                                                                                                                                                                                                                                                                                                                                                                                                                                                                                                                                                                                                                                                                                                                                                    |
| Article Type:                   | Research                                                                                                                                                                                                                                                                                                                                                                                                                                                                                                                                                                                                                                                                                                                                                                                                                                                                                               |
| Date Submitted by the Author:   | 19-Sep-2017                                                                                                                                                                                                                                                                                                                                                                                                                                                                                                                                                                                                                                                                                                                                                                                                                                                                                            |
| Complete List of Authors:       | Jackson, Holly; Keele University, Research Institute for Primary Care and Health Sciences; University of Nottingham, School of Mathematical Sciences<br>Barnett, Lauren; Keele University, Arthritis Research UK Primary Care Centre<br>Jordan, Kelvin; Keele University, Arthritis Research UK Primary Care Centre; Keele Clinical Trials Unit, David Weatherall Building<br>Dziedzic, Krysia; Arthritis Research Campaign National Primary Care Centre<br>Cottrell, Elizabeth ; Keele University, Research Institute for Primary Care & Health Sciences<br>Finney, Andrew; Keele University, Research Institute for Primary Care and Health Sciences<br>Paskins, Zoe; Keele University, Arthritis Research UK Primary Care Centre, Research Institute for Primary Care & Health Sciences<br>Edwards, John; Keele University Faculty of Health, Research Institute for Primary Care & Health Sciences |
| <b>Primary Subject Heading</b>: | General practice / Family practice                                                                                                                                                                                                                                                                                                                                                                                                                                                                                                                                                                                                                                                                                                                                                                                                                                                                     |
| Secondary Subject Heading:      | Rheumatology                                                                                                                                                                                                                                                                                                                                                                                                                                                                                                                                                                                                                                                                                                                                                                                                                                                                                           |
| Keywords:                       | Osteoarthritis, PRIMARY CARE, Quality in health care < HEALTH SERVICES ADMINISTRATION & MANAGEMENT, Latent class analysis                                                                                                                                                                                                                                                                                                                                                                                                                                                                                                                                                                                                                                                                                                                                                                              |
|                                 |                                                                                                                                                                                                                                                                                                                                                                                                                                                                                                                                                                                                                                                                                                                                                                                                                                                                                                        |

SCHOLARONE™  
Manuscripts

1  
2  
3 **1 Patterns of routine primary care for osteoarthritis: a cross-sectional electronic health records**  
4  
5 **2 study**  
6

7 3 H Jackson<sup>1,2</sup>, LA Barnett<sup>1</sup>, KP Jordan<sup>1,3</sup>, KS Dziedzic<sup>1</sup>, E Cottrell<sup>1</sup>, AG Finney<sup>1</sup>, Z Paskins<sup>1</sup>, JJ Edwards<sup>1</sup>  
8

9  
10 4 H Jackson: holly@gigglane.com

11  
12 5 LA Barnett: l.a.barnett@keele.ac.uk

13  
14 6 KP Jordan: k.p.jordan@keele.ac.uk

15  
16 7 KS Dziedzic: k.s.dziedzic@keele.ac.uk

17  
18 8 E Cottrell: e.cottrell@keele.ac.uk

19  
20 9 AG Finney: a.finney@keele.ac.uk

21  
22 10 Z Paskins: z.paskins@keele.ac.uk

23  
24 11 JJ Edwards: j.j.edwards@keele.ac.uk

25  
26 12 <sup>1</sup>Keele University Research Institute for Primary Care and Health Sciences; <sup>2</sup>University of

27  
28 13 Nottingham School of Mathematical Sciences; <sup>3</sup>Keele Clinical Trials Unit, David Weatherall Building,

29  
30 14 Keele University, Staffordshire, ST5 5BG  
31  
32  
33  
34  
35  
36  
37

38 16 Correspondence to: Dr John Edwards, Arthritis Research UK Primary Care Centre,

39  
40 17 Research Institute for Primary Care & Health Sciences, Keele University,

41  
42 18 Staffordshire, ST5 5BG; e-mail: [j.j.edwards@keele.ac.uk](mailto:j.j.edwards@keele.ac.uk); tel. +44 (0) 1782 733977; fax.: +44 (0) 1782

43  
44 19 734719  
45  
46

47 20 Word count: 3424  
48  
49

50 21 Running title: Patterns of primary care for osteoarthritis  
51  
52  
53  
54  
55  
56  
57  
58  
59  
60

1  
2  
3 **22 Abstract**

4  
5 **23 Objective**

6  
7 24 To determine common patterns of recorded primary care for osteoarthritis (OA), and  
8  
9 25 characteristics associated with the quality of recorded care.

10  
11  
12 **26 Design**

13  
14 27 An observational study nested within a cluster-randomised controlled trial.

15  
16  
17 **28 Setting**

18  
19 29 Eight UK general practices who were part of the Management of OsteoArthritis In ConsultationS  
20  
21 30 (MOSAICS) study.

22  
23  
24 **31 Participants**

25  
26 32 Patients recorded as consulting within the eight general practices for clinical OA.

27  
28 **33 Primary outcomes**

29  
30 34 Achievement of seven quality indicators of care, recorded through an electronic template or  
31  
32 35 routinely recorded in the electronic healthcare records, were identified for patients aged  $\geq 45$  years  
33  
34 36 consulting over a six-month period with clinical OA. Latent class analysis was used to cluster  
35  
36 37 patients based on care received. Clusters were compared on patient and clinician-level  
37  
38 38 characteristics.

39  
40  
41  
42 **39 Results**

43  
44 40 1724 patients consulted with clinical OA. Common patterns of recorded quality care were: Cluster 1  
45  
46 41 (38%, *High*) received most quality indicators of care; Cluster 2 (11%, *Moderate*) had pain and  
47  
48 42 function assessment, and received or were considered for other indicators; Cluster 3 (17%, *Low*)  
49  
50 43 had pain and function assessment, and received or were considered for paracetamol or topical  
51  
52 44 NSAIDs; Cluster 4 (35%, *None*) had no recorded quality indicators. Patients with higher levels of  
53  
54 45 recorded care consulted a clinician who saw more OA patients, consulted multiple times, and had  
55  
56  
57  
58  
59  
60

1  
2  
3 46 less morbidity. Those in the *High* cluster were more likely to have recorded diagnosed OA and have  
4  
5 47 knee or hip OA.

## 6 48 **Conclusions**

7  
8  
9  
10 49 Appropriate delivery of core interventions and relatively safe pharmacological options for OA are  
11  
12 50 still not consistently recorded as provided in primary care. Further research to understand clinical  
13  
14 51 recording behaviours and determine potential barriers to quality care alongside effective training  
15  
16 52 for clinicians is needed.

17  
18  
19 53 **Trial registration** number ISRCTN06984617

## 20 54 **Keywords**

21  
22  
23 55 Osteoarthritis, primary care, quality indicators, latent class analysis

## 24 56 **Article summary**

- 25  
26  
27  
28 57 • This paper describes a novel use of latent class analysis to identify patterns of primary care  
29  
30 58 for osteoarthritis (OA)
- 31  
32  
33 59 • The population studied was large and diverse, increasing generalisability, and based on a  
34  
35 60 broad definition of clinical OA to reduce selection bias
- 36  
37  
38  
39 61 • The analysis used some quality indicators of care newly-implemented in practices through  
40  
41 62 an electronic template, which may have increased the recorded quality of care compared to  
42  
43 63 routine practice
- 44  
45  
46  
47 64 • Some care processes may have occurred but not been recorded

48  
49  
50 65

51  
52 66 **Word count** 3424

## 67 Introduction

68 Osteoarthritis (OA) is a common reason for adults aged  $\geq 45$  years to consult primary care. Annually,  
69 in the UK, 4% of such adults are recorded as consulting in general practice for diagnosed OA, with  
70 an additional 8% recorded with joint pain likely to be attributable to OA [1]. Osteoarthritis is a  
71 common reason for disability, and was ranked the 11<sup>th</sup> biggest cause of disability by the 2010  
72 Global Burden of Disease (GBD) [2].

73 The UK National Institute for Health and Care Excellence (NICE) OA management guidelines  
74 recommend core strategies of information provision, physical activity and exercise, and weight  
75 management, supplemented with use of relatively safe pharmacological management strategies  
76 (for example, topical non-steroidal anti-inflammatory drugs [NSAIDs]), as necessary [3].  
77 Intensification of management should depend on response to these initial approaches. However,  
78 there is evidence that patients diagnosed with OA do not receive care that is well aligned to  
79 evidence-based recommendations and which may be overly dependent on pharmacological  
80 methods [4].

81 We have previously identified variation between clinicians in recorded quality of individual  
82 indicators of OA care [5]. However, patterns of OA care and factors linked with increased  
83 probability of adherence to OA quality standards are less well-studied. Using electronic general  
84 practice records data, the objectives of this study were to determine patterns of recorded primary  
85 care for OA based on quality indicators, and to determine associations between higher-quality  
86 recorded care and patient and clinician characteristics.

## 87 Methods

88 This analysis used data from the Management of OsteoArthritis In ConsultationS (MOSAICS) study  
89 (Trial registration number ISRCTN06984617), approved by the North West Research Ethics

1  
2  
3 90 Committee, Cheshire (reference: 10/H1017/76) [6]. MOSAICS was a mixed-methods study, which  
4  
5 91 investigated the effect of a model consultation for clinical OA. It was set within eight general  
6  
7 92 practices in Cheshire, Shropshire and Staffordshire, UK and is reported in line with STROBE  
8  
9  
10 93 guidelines. The current analysis used anonymised information from the electronic health records  
11  
12 94 (EHR) of these practices for the six-month baseline period before randomisation of practices to  
13  
14 95 intervention or control arms [6]. At the beginning of the baseline period, a computerised template  
15  
16 96 (“e-template”, described below) was installed within the EHR and all practices continued with  
17  
18  
19 97 otherwise usual care until the end of the baseline period.

20  
21  
22 98 The study population was all patients aged  $\geq 45$  years registered with the eight general practices  
23  
24 99 who consulted with clinical OA in the baseline six-month period. UK general practice utilises Read  
25  
26 100 codes to record morbidities; within MOSAICS, clinical OA was defined as either a recorded OA Read  
27  
28 101 code or a peripheral joint pain Read code for the hand, hip, knee, or foot, to reduce the potential  
29  
30  
31 102 for selection bias in clinician coding. Patients were allocated to an index clinician, being the clinician  
32  
33 103 recording the first formally diagnosed (i.e. OA Read-coded) OA consultation in the baseline period  
34  
35 104 or, if none, the first peripheral joint pain coded consultation in the same period.

36  
37  
38  
39 105 Outcome measures were the seven indicators of quality of care for OA in general practice recorded  
40  
41 106 in the EHR. These could be entered into the EHR as routinely-recorded data or captured through  
42  
43 107 the e-template. The identification and synthesis of appropriate quality indicators using a systematic  
44  
45 108 review and NICE 2008 guidelines has previously been reported [5,7,8]. The indicators are shown in  
46  
47  
48 109 Table 1.

49  
50  
51 110 Achievement of prescribing and referral indicators (recorded prescription of topical NSAIDs or  
52  
53 111 paracetamol, and onward physiotherapy referral) were determined from data in the routinely-

1  
2  
3 112 recorded component of the EHR and were determined to have been achieved if they were recorded  
4  
5 113 within 14 days of any clinical OA consultation in the six-month period.  
6  
7

8 114 The e-template facilitated recording of achievement of indicators that are known to be poorly  
9  
10 115 captured in routinely-recorded data [5]: (i) assessment of pain and function, (ii) provision or  
11  
12 116 consideration of OA information, exercise advice, and weight loss advice, (iii) consideration of  
13  
14 117 paracetamol or topical NSAID and (iv) consideration of physiotherapy referral. The entry of a code  
15  
16 118 for clinical OA for a patient aged  $\geq 45$  years triggered the e-template [5]. The clinicians could  
17  
18 119 complete the e-template at any point throughout the consultation and could choose to complete  
19  
20 120 all, some, or none of the e-template. The e-template has been endorsed by NICE to facilitate  
21  
22 121 enhanced uptake of quality standards [9].  
23  
24  
25  
26

27 122 Data from the EHR (derived from both routinely-recorded data and the e-template) were  
28  
29 123 amalgamated within the relevant quality indicator. For example, consideration of paracetamol and  
30  
31 124 topical NSAIDs (entered using e-template) was combined with actual prescription of these agents  
32  
33 125 (routinely-recorded data). Outcomes (Table 1) were dichotomous for pain and function  
34  
35 126 assessments. For all other indicators, the possibilities were for the indicator to be *achieved*,  
36  
37 127 *considered* (without record of having been delivered), or *not considered*. There is evidence that  
38  
39 128 weight recording is more common in people who are overweight compared to those who are not  
40  
41 129 [10]. To minimise the effect of missing data and to preserve the ability of the model to identify  
42  
43 130 people who needed weight loss advice but were not recorded as receiving it, any patient recorded  
44  
45 131 as being of normal weight or who did not have a weight recorded was allocated to *considered* for  
46  
47 132 weight loss advice.  
48  
49  
50  
51  
52  
53  
54  
55  
56  
57  
58  
59  
60



1  
2  
3 133 We investigated how patterns of care based on the quality indicators were associated with other  
4  
5 134 OA care processes, recorded in the routine EHR within 14 days of any clinical OA consultation:  
6  
7 135 prescriptions for oral NSAIDs and opioids, and relevant X-rays (hand, hip knee, or foot).  
8  
9  
10 136 Factors potentially associated with patterns of quality of care that were considered were: patient  
11  
12 137 age, gender, body mass index (BMI), the site of clinical OA, whether patients had multiple or a  
13  
14 138 single consultation for clinical OA within the six-month time period, whether the patient was a new  
15  
16 139 consulter (no clinical OA consultations within the previous 12 months) and total morbidity. Total  
17  
18 140 morbidity was measured by a count of British National Formulary (BNF) subchapters from which  
19  
20 141 prescriptions had been issued in the previous 12 months [11]. A proxy measure of OA workload for  
21  
22 142 the patients' index clinician was determined by dichotomising the number of index clinical OA  
23  
24 143 consultations at the median value (14) across clinicians.  
25  
26  
27  
28  
29

#### 30 Statistical analysis

31  
32 145 Latent class analysis (LCA) was used to cluster patients into groups based on recorded achievement  
33  
34 146 of the seven quality indicators. All patients within a cluster should have similar recorded care for  
35  
36 147 their OA or joint pain, but care should differ between patients belonging to different clusters [12].  
37  
38  
39  
40 148 Latent class models were fitted, beginning with a one-cluster model where all the patients were  
41  
42 149 assumed to have been given the same pattern of treatment of OA, up to a seven-cluster model. To  
43  
44 150 determine the optimum number of clusters, we considered the Bayesian Information Criterion (BIC,  
45  
46 151 whereby the lowest BIC indicated the best model) with the size of each cluster, and the  
47  
48 152 interpretability of the model. Posterior probabilities (PP) for a patient (the probabilities of that  
49  
50 153 patient belonging to each of the clusters within the model) were identified. The cluster that had the  
51  
52 154 largest PP for a patient was the cluster that patient was assigned to. We used the mean PP for  
53  
54  
55  
56  
57  
58  
59  
60

1  
2  
3 155 patients allocated to each cluster to measure cluster separation; a mean PP of more than 0.7  
4  
5 156 indicated that the patients were clearly assigned to that specific cluster [13].  
6  
7  
8 157 Using a two-level (patient within index clinician) multinomial multilevel logistic regression,  
9  
10 158 associations between the patient and clinician-level covariates and cluster membership were  
11  
12 159 estimated and reported as relative risk ratios (RRR) with 95% confidence intervals (CI). We also  
13  
14 160 used chi-squared tests to compare between clusters on levels of pain and functional limitation  
15  
16 161 (none, mild, moderate, severe) as recorded in the e-template.  
17  
18  
19  
20  
21 162 Statistical analysis was performed using R studio version 3.3.0, and MLwiN version 2.35 for  
22  
23 163 Windows.

## 26 164 **Results**

28 165 During the six-month period, 1724 patients consulted with a recorded clinical OA code and  
29  
30 166 triggered the e-template. All were included in the analysis. 1014 (59%) of these were female, mean  
31  
32 167 age was 66.1 years (SD: 11.9) and 582 (34%) patients were recorded with a diagnosis of OA rather  
33  
34 168 than peripheral joint pain.  
35  
36  
37

38 169 As previously reported [5], pain (63%) and function (62%) assessment were the most commonly  
39  
40 170 achieved indicators. Recorded provision of OA information (44%), and exercise advice (45%) were  
41  
42 171 achieved in under half of patients, and weight loss advice in less than a third of patients (31%). 609  
43  
44 172 (35%) patients were prescribed paracetamol or topical NSAIDs. A referral for physiotherapy was  
45  
46 173 made in 7% of patients.  
47  
48  
49  
50

51 174 Table 2 shows the goodness-of-fit statistics for the LCA models with one to seven clusters. The four-  
52  
53 175 cluster model gave the lowest BIC, and each of the clusters in the three-, four-, and five-cluster  
54  
55 176 models had a mean PP for patients belonging to that cluster above 0.83. In the three-cluster model  
56  
57  
58  
59  
60

1  
2  
3 177 the smallest cluster size was 430 (25%), in the four-cluster model it was 184 (11%) and the five-  
4  
5 178 cluster model had a smallest cluster size of 142 (8%). Based on the cluster sizes, goodness-of-fit  
6  
7 179 statistics, and interpretability, the four-cluster model was chosen as the optimal model.

8  
9  
10 180 Table 3 shows the probability of recorded receipt of each of the seven quality indicators for  
11  
12 181 patients allocated to each cluster. Patients in cluster 1 ( $n=659$ , 38%) had a high probability of having  
13  
14 182 pain and function assessment recorded (probabilities over 0.97) and of being given OA information  
15  
16 183 and exercise advice (probabilities over 0.93). Patients' care within this cluster was recorded as  
17  
18 184 having achieved a median of five indicators and considered for, but not achieved, a median of one  
19  
20 185 further indicator. Cluster 1 was therefore labelled as having a *High* level of recorded quality of care.  
21  
22 186 Cluster 2 ( $n=184$ , 11%; *Moderate*) had a high probability of pain and function assessment  
23  
24 187 (probabilities over 0.95) and of consideration for (but not receipt of) physiotherapy and topical  
25  
26 188 NSAID or paracetamol. They also had a high probability of being given or considered for OA  
27  
28 189 information and exercise advice. Their recorded care achieved a median of three indicators and  
29  
30 190 they were considered for care relating to a median of three further indicators. Cluster 3 ( $n=286$ ,  
31  
32 191 17%; *Low*) had a high probability of pain and function assessment (probabilities over 0.87), and  
33  
34 192 were likely to be prescribed or considered for paracetamol or topical NSAIDs but generally were not  
35  
36 193 recorded as receiving or being considered for other indicators (received a median of three  
37  
38 194 processes and considered for a median of one further). Cluster 4 ( $n=595$ , 35%; *None*) had low  
39  
40 195 probabilities of a record of receiving or being considered for any indicator (received and considered  
41  
42 196 median zero indicators).

43  
44  
45 197 Supplementary Table 1 compares the number of people in each cluster who were expected, based  
46  
47 198 on the model, to receive each care process (identified by the indicators) and the number actually  
48  
49  
50  
51  
52  
53  
54  
55  
56  
57  
58  
59  
60

1  
2  
3 199 recorded as receiving them. Differences between observed and expected values were small and  
4  
5 200 generally related to distinguishing between care received compared to care considered.  
6  
7  
8 201 Patient and clinician characteristics for each cluster are shown in Table 4 with results from the  
9  
10 202 multinomial model comparing clusters in Table 5. Compared to the *None* cluster, patients in the  
11  
12 203 *High* and *Moderate* clusters tended to consult with a clinician with a higher OA workload, consult  
13  
14 204 multiple times, and have less total morbidity (Table 5). The patients with *High* level of recorded  
15  
16 205 care were more likely to have diagnosed OA (adjusted RRR 1.81, 95% CI 1.41, 2.32) and less likely to  
17  
18 206 have hand or foot clinical OA than patients in the *None* cluster, whilst patients in the *Moderate*  
19  
20 207 cluster were less likely to have diagnosed OA (RRR 0.55, 95% CI 0.35, 0.85) or be overweight (RRR  
21  
22 208 0.57, 95% CI 0.39, 0.85), but more likely to have clinical OA in multiple sites (RRR 1.89, 95% CI 0.99,  
23  
24 209 3.59) than patients in the *None* cluster. Patients in the *Low* cluster were less likely than patients in  
25  
26 210 the *None* cluster to have a single consultation (RRR 0.45, 95% CI 0.34, 0.60), have clinical OA in the  
27  
28 211 foot (RRR 0.25, 95% CI 0.13, 0.51), or have multimorbidity.  
29  
30  
31  
32  
33  
34 212 Those in the *High* cluster had slightly higher levels of opioid prescription (36%; chi-squared test,  
35  
36 213  $p=0.06$ ), oral NSAID prescription (20%;  $p=0.01$ ), and recorded X-rays (22%;  $p<0.01$ ) than patients in  
37  
38 214 the other clusters, although differences between the *High* and *Low* clusters, in particular, were  
39  
40 215 small (Table 6).  
41  
42  
43  
44  
45 216 In those with a record of a pain assessment, patients in the *High* cluster were more likely to have  
46  
47 217 recorded moderate or severe pain (70% vs 57% in the *Moderate* cluster and 64% in the *Low*  
48  
49 218 cluster). The same pattern was seen for functional limitation although differences between clusters  
50  
51 219 were smaller (Table 6).  
52  
53  
54  
55  
56  
57  
58  
59  
60

## 220 Discussion

221 This study has identified four patterns of recorded primary care management of OA based on  
222 previously identified quality indicators of care. Just over a third of patients consulting for clinical OA  
223 had recorded care meeting the majority of quality indicators. Another third were not recorded as  
224 having received or been considered for any of these quality indicators. Factors associated with  
225 higher recorded quality of care included receiving an OA diagnosis, OA in the knee or hip rather  
226 than foot or hand, lower total morbidity burden, multiple consultations for clinical OA, and initial  
227 consultation with a clinician who was recorded as seeing more than the median number of OA  
228 patients. Previous evidence has demonstrated that guidelines for treatment of OA within primary  
229 care are not consistently adhered to [14-16]. The way in which receipt of different recommended  
230 care processes for OA are grouped within patients has not previously been investigated. In our  
231 study, 38% of the patients were recorded as having received a relatively large number of quality  
232 indicators and could be regarded as a group achieving the closest to optimal care based on these  
233 indicators (the *High* group). Care for members of two clusters (*Moderate* and *Low*) achieved some  
234 quality indicators overall but can be distinguished by the fact that information, advice (exercise,  
235 weight loss) and physiotherapy were more likely to be considered in the *Moderate* cluster than the  
236 *Low*. A third of patients were in the *None* cluster which demonstrated the weakest recorded quality  
237 of care with the majority of this group lacking recorded achievement or consideration of any  
238 indicator. The patients in the cluster with the best recorded care (*High*) were also more likely to  
239 receive other elements of care such as oral NSAIDs and referral for X-ray. NICE does not  
240 recommend routine use of X-ray for OA diagnosis and suggests that opioids and oral NSAIDs should  
241 be used only if topical NSAIDs and paracetamol do not relieve pain [3]. The greater use of these  
242 approaches in the *High* cluster may reflect worse severity of OA and this cluster did have slightly  
243 higher levels of clinician-recorded pain and functional limitation than those in the *Moderate* and

1  
2  
3 244 *Low* clusters. While one hypothesis may be that patients in the *High* cluster are given all possible  
4  
5 245 care elements, this is unlikely to be the case as differences between clusters on the non-quality  
6  
7 246 indicator elements of care were generally small, and most patients in the *High* cluster were not in  
8  
9 247 receipt of these non-recommended approaches.

11  
12  
13 248 It is possible that the clinicians treating those in the *High* cluster were more engaged with, or more  
14  
15 249 confident in managing OA. Confidence in OA management could be associated with confidence in  
16  
17 250 OA diagnosis, which may explain the increased use of OA Read codes in these patients. Conversely,  
18  
19 251 where OA Read codes were not given there may have been uncertainty about both diagnosis and  
20  
21 252 management. Previous qualitative observational research of primary care consultations has  
22  
23 253 identified confusion about the construct of OA, with family doctors tending not to use the term  
24  
25 254 'osteoarthritis' with patients but instead, normalising symptoms [17]. A formal diagnosis of OA,  
26  
27 255 delivered explicitly, may be needed for holistic components of care such as patient education and  
28  
29 256 self-management support to be offered [5,17]. Patients with greater morbidity received a lower  
30  
31 257 recorded quality of care and this may be because they were (perhaps erroneously) considered less  
32  
33 258 suitable for non-pharmacological and relatively safe pharmacological options. It is also possible that  
34  
35 259 OA was given lower priority compared to their other problems [17,18]. Patients with foot (and to  
36  
37 260 some extent hand) OA may also have been particularly susceptible to lower levels of recorded  
38  
39 261 quality of care and this site has been less well-investigated with regard to effective interventions  
40  
41 262 [19,20].

42  
43 263 This is the first study known to the authors which examines patterns of quality of care of chronic  
44  
45 264 conditions such as OA. Other analyses of recorded quality of care for OA have reported some  
46  
47 265 influences on individual process measures. Broadbent et al. identified older age as being associated  
48  
49 266 with reduced information provision but increased initial use of paracetamol and, where an oral  
50  
51  
52  
53  
54  
55  
56  
57  
58  
59  
60

1  
2  
3 267 NSAID was prescribed, greater first-use of ibuprofen or a COX-2 selective NSAID; female sex was  
4  
5 268 associated with increased information provision; severe OA was associated with increased pain and  
6  
7 269 function assessment in the previous year [21]. Unlike in this analysis, Min et al. identified an  
8  
9 270 association between multimorbidity (using a count of conditions) and better quality of care  
10  
11  
12 271 amongst vulnerable elders, some of whom had OA [22].  
13  
14

15 272 This study has important strengths. The study population was large and the practices were diverse  
16  
17 273 with respect to urbanisation, staffing, deprivation, and size of registered population, implying good  
18  
19 274 generalisability. Prescription recording is likely to be near-complete since most prescribing is  
20  
21 275 electronic and use of the e-template mitigates against missing data from patients using over-the-  
22  
23 276 counter pharmacological approaches. The e-template also facilitates enhanced data collection in  
24  
25 277 general practice without incurring biases such as social desirability. LCA uses probabilistic modelling  
26  
27 278 and finite mixture distributions to collect participants into clusters, which is a different method to  
28  
29 279 traditional clustering techniques (e.g. cluster analysis). Given this, LCA should produce a lower  
30  
31 280 misclassification rate and better statistical criteria for investigating model fit [23]. Whilst there was  
32  
33 281 variation in quality of care between clinicians and practices [5], clustering effects of patients within  
34  
35 282 clinicians was adjusted for through the multilevel model. There are some limitations in this analysis.  
36  
37 283 Due to the inherent nature of EHR studies, the data extracted is a function of both the individual  
38  
39 284 clinician's clinical and recording behaviours. It is therefore possible that some patients were  
40  
41 285 misclassified as the lack of a record of a care process does not conclusively demonstrate that it did  
42  
43 286 not occur. Compared to prescription recording, it is less certain how well-recorded referrals are.  
44  
45 287 However, despite the limitations of EHR data, the differences in levels of prescribed analgesia  
46  
47 288 between the clusters suggests there were real differences in care between the four clusters  
48  
49 289 identified. Conversely, patients may have been coded as receiving some elements of care without  
50  
51  
52  
53  
54  
55  
56  
57  
58  
59  
60

1  
2  
3 290 this necessarily having been conducted in a comprehensive or meaningful way. Triangulation of  
4  
5 291 medical record indicators with patient-reported indicators would be needed to evaluate this  
6  
7 292 further. Our assumption that those without a weight recorded were considered for weight loss  
8  
9 293 advice was based on the increased likelihood of a weight recording if a patients appears overweight  
10  
11 294 [10] but will have over-estimated the proportion of patients considered for weight loss advice.  
12  
13  
14 295 However, over 80% of patients did have a weight record. The association between multiple  
15  
16 296 consultations for OA and clusters with higher recorded quality of care may reflect greater  
17  
18 297 opportunity to provide and record care but may also have reflected a greater disease severity and  
19  
20 298 healthcare need. Although we considered comorbidities, previous research has identified that OA  
21  
22 299 may be discussed in complex consultations about multiple problems [17] and the length of time  
23  
24 300 discussing OA in a consultation would likely be an important influence on the level of recorded care.  
25  
26 301 It is also possible that those with recorded peripheral joint pain rather than recorded OA may not  
27  
28 302 have OA, particularly in the foot [24]. The e-template itself was previously found to be associated  
29  
30 303 with increased prescription of paracetamol and topical NSAIDs and so the patterns of care recorded  
31  
32 304 may not be generalisable to practices not using the e-template [5].  
33  
34  
35  
36  
37  
38 305 Promotion of core interventions (information, exercise, and weight loss advice), alongside  
39  
40 306 appropriate use of the relatively safe pharmacological options, remains an important strategy in the  
41  
42 307 primary care management of OA but many patients receive few or none of these. This is particularly  
43  
44 308 true for patients with higher levels of morbidity, or hand or foot OA. Whilst there is substantial  
45  
46 309 variation in recorded care of OA, high quality care appears feasible given we found that over a third  
47  
48 310 of patients with OA were recorded as receiving most core recommendations. A structured annual  
49  
50 311 review for people with OA [25] as recommended by NICE [9] may help, possibly nurse-led,  
51  
52 312 integrated, where appropriate, into a multimorbidity review. However, barriers to providing and  
53  
54  
55  
56  
57  
58  
59  
60



1  
2  
3 313 recording high quality care still need to be identified and mechanisms need to be explored to  
4  
5 314 ensure appropriate delivery of care to all patients.  
6  
7

### 8 315 **Acknowledgements** 9

10  
11 316 The authors would like to thank the OA Research Users' Group, NIHR West Midlands CRN Primary  
12  
13 317 Care, and the network, health informatics, study coordinator, research nurse, and administrative  
14  
15 318 staff at Keele University's Arthritis Research UK Primary Care Centre and Keele Clinical Trials Unit  
16  
17 319 for all their support and assistance with this study. The authors would like to give special thanks to  
18  
19 320 all of the staff and patients at the participating general practices, and the GP facilitators who  
20  
21 321 provided support to the general practices involved in the study.  
22  
23  
24  
25

### 26 322 **Author statement** 27

28  
29 323 HJ and LB performed the analysis and drafted and revised the paper. KPJ and JJE developed the  
30  
31 324 analysis plan, cleaned the data, and drafted and revised the paper; KSD is PI for the study, led the  
32  
33 325 design of the MOSAICS study, and revised the paper; EC, ZP and AF were involved in the  
34  
35 326 interpretation of the findings and revised the paper. All authors have approved the final version.  
36  
37  
38

### 39 327 **Funding** 40

41  
42 328 This paper presents independent research funded by the National Institute for Health Research  
43  
44 329 (NIHR) Programme Grant (RP-PG-0407-10386). The views expressed in this paper are those of the  
45  
46 330 authors and not necessarily those of the NHS, the NIHR or the Department of Health. This research  
47  
48 331 was also funded by the Arthritis Research UK Primary Care Centre grant (Grant Number 18139). HJ  
49  
50 332 and LB were funded by a NIHR Research Methods Training Fellowship. KSD is part-funded by the  
51  
52 333 NIHR Collaborations for Leadership in Applied Health Research and Care West Midlands and a  
53  
54  
55  
56  
57  
58  
59  
60

1  
2  
3 334 Knowledge Mobilisation Research Fellowship (KMRF-2014-03-002) from the NIHR. EC and JJE are  
4  
5 335 Academic Clinical Lecturers in Primary Care funded by the NIHR; JJE was previously supported by an  
6  
7 336 In-Practice Fellowship from the NIHR.  
8  
9

10 337 **Competing interests**

11  
12  
13  
14 338 Prof. Jordan reports grants from National Institute for Health Research, grants from Arthritis  
15  
16 339 Research UK, during the conduct of the study. Prof. Dziedic reports grants from Arthritis Research  
17  
18 340 UK Centre in Primary Care grant, grants from National Institute for Health Research (NIHR)  
19  
20 341 Programme Grant (RP-PG-0407-10386), during the conduct of the study; grants from Knowledge  
21  
22 342 Mobilisation Research Fellowship (KMRF-2014-03-002), non-financial support from National  
23  
24 343 Institute of Health and Care Excellence, other from Bone and Joint Decade 2015 Conference Oslo,  
25  
26 344 non-financial support from National Institute of Health and Care Excellence Quality Standards,  
27  
28 345 grants from EIT-Health, other from Osteoarthritis Research Society International, outside the  
29  
30 346 submitted work; and Member of the NICE Osteoarthritis Guidelines Development Group CG 59  
31  
32 347 (2008) and CG 177 (2014). The other authors declare no competing interests.  
33  
34  
35  
36  
37

38 348 **Data access statement**

39  
40  
41 349 The Centre has established data sharing arrangements to support joint publications and other  
42  
43 350 research collaborations. Applications for access to anonymised data from our research databases  
44  
45 351 are reviewed by the Centre's Data Custodian and Academic Proposal (DCAP) Committee and a  
46  
47 352 decision regarding access to the data is made subject to the NRES ethical approval first provided for  
48  
49 353 the study and to new analysis being proposed. Further information on our data sharing procedures  
50  
51 354 can be found on the Centre's website  
52  
53  
54  
55  
56  
57  
58  
59  
60

1  
2  
3  
4  
5  
6  
7  
8  
9  
10  
11  
12  
13  
14  
15  
16  
17  
18  
19  
20  
21  
22  
23  
24  
25  
26  
27  
28  
29  
30  
31  
32  
33  
34  
35  
36  
37  
38  
39  
40  
41  
42  
43  
44  
45  
46  
47  
48  
49  
50  
51  
52  
53  
54  
55  
56  
57  
58  
59  
60

355 (<http://www.keele.ac.uk/pchs/publications/datasharingresources/>) or by emailing the Centre's  
356 data manager ([primarycare.datasharing@keele.ac.uk](mailto:primarycare.datasharing@keele.ac.uk)).

357

For peer review only

## 358 References

- 359 1. Jordan KP, Joud A, Bergknut C, et al. International comparisons of the consultation  
360 prevalence of musculoskeletal conditions using population-based healthcare data  
361 from England and Sweden. *Ann Rheum Dis* 2014;**73**(1):212-8.
- 362 2. Vos T, Flaxman AD, Naghavi M, et al. Years lived with disability (YLDs) for 1160  
363 sequelae of 289 diseases and injuries 1990-2010: a systematic analysis for the  
364 Global Burden of Disease Study 2010. *Lancet* 2012;**380**(9859):2163-96.
- 365 3. National Institute for Health & Care Excellence. NICE clinical guideline [CG177]  
366 Osteoarthritis: Care and management in adults. London: National Institute for Health  
367 & Care Excellence, 2014.
- 368 4. Hagen KB, Smedslund G, Osteras N, et al. Quality of Community-Based Osteoarthritis  
369 Care: A Systematic Review and Meta-Analysis. *Arthritis Care Res (Hoboken)*  
370 2016;**68**(10):1443-52.
- 371 5. Edwards JJ, Jordan KP, Peat G, et al. Quality of care for OA: the effect of a point-of-care  
372 consultation recording template. *Rheumatology (Oxford, England)* 2015;**54**(5):844-  
373 53.
- 374 6. Dziejczak KS, Healey EL, Porcheret M, et al. Implementing the NICE osteoarthritis  
375 guidelines: a mixed methods study and cluster randomised trial of a model  
376 osteoarthritis consultation in primary care--the Management of OsteoArthritis In  
377 Consultations (MOSAICS) study protocol. *Implement Sci* 2014;**9**(1):95.
- 378 7. Edwards JJ, Khanna M, Jordan KP, et al. Quality indicators for the primary care of  
379 osteoarthritis: a systematic review. *Ann Rheum Dis* 2015;**74**(3):490-8.
- 380 8. National Institute for Health & Clinical Excellence. NICE clinical guideline [CG59]  
381 Osteoarthritis: the care and management of osteoarthritis in adults. London: National  
382 Institute for Health & Clinical Excellence, 2008.
- 383 9. National Institute for Health & Care Excellence. Quality standard for osteoarthritis (NICE  
384 quality standard 87). Secondary Quality standard for osteoarthritis (NICE quality  
385 standard 87) 2015. <https://www.nice.org.uk/guidance/qs87>.
- 386 10. Waring ME, Roberts MB, Parker DR, et al. Documentation and management of  
387 overweight and obesity in primary care. *Journal of the American Board of Family  
388 Medicine : JABFM* 2009;**22**(5):544-52.
- 389 11. Brilleman SL, Salisbury C. Comparing measures of multimorbidity to predict outcomes  
390 in primary care: a cross sectional study. *Fam Pract* 2013;**30**(2):172-8.
- 391 12. Magidson J, Vermunt JK. *Latent class models*. Thousand Oaks: Sage Publications,  
392 2004.
- 393 13. Clark DB, Jones BL, Wood DS, et al. Substance use disorder trajectory classes:  
394 diachronic integration of onset age, severity, and course. *Addictive behaviors*  
395 2006;**31**(6):995-1009.
- 396 14. Conrozier T, Marre JP, Payen-Champenois C, et al. National survey on the non-  
397 pharmacological modalities prescribed by French general practitioners in the  
398 treatment of lower limb (knee and hip) osteoarthritis. Adherence to the EULAR  
399 recommendations and factors influencing adherence. *Clin Exp Rheumatol*  
400 2008;**26**(5):793-8.
- 401 15. DeHaan MN, Guzman J, Bayley MT, et al. Knee osteoarthritis clinical practice  
402 guidelines -- how are we doing? *J Rheumatol* 2007;**34**(10):2099.
- 403 16. Denoed L, Mazieres B, Payen-Champenois C, et al. First line treatment of knee  
404 osteoarthritis in outpatients in France: adherence to the EULAR 2000  
405 recommendations and factors influencing adherence. *Ann Rheum Dis*  
406 2005;**64**(1):70-4.

- 1  
2  
3 407 17. Paskins Z, Sanders T, Croft PR, et al. The Identity Crisis of Osteoarthritis in General  
4 408 Practice: A Qualitative Study Using Video-Stimulated Recall. *Ann Fam Med*  
5 409 2015;**13**(6):537-44.  
6 410 18. Coxon D, Frisher M, Jinks C, et al. The relative importance of perceived doctor's  
7 411 attitude on the decision to consult for symptomatic osteoarthritis: a choice-based  
8 412 conjoint analysis study. *BMJ Open* 2015;**5**(10):e009625.  
9 413 19. Iagnocco A, Rizzo C, Gattamelata A, et al. Osteoarthritis of the foot: a review of the  
10 414 current state of knowledge. *Med Ultrason* 2013;**15**(1):35-40.  
11 415 20. Conaghan PG, Kloppenburg M, Schett G, et al. Osteoarthritis research priorities: a  
12 416 report from a EULAR ad hoc expert committee. *Ann Rheum Dis* 2014;**73**(8):1442-5.  
13 417 21. Broadbent J, Maisey S, Holland R, et al. Recorded quality of primary care for  
14 418 osteoarthritis: an observational study. *Br J Gen Pract* 2008;**58**(557):839-43.  
15 419 22. Min LC, Wenger NS, Fung C, et al. Multimorbidity is associated with better quality of  
16 420 care among vulnerable elders. *Med Care* 2007;**45**(6):480-8.  
17 421 23. Hougaard P. Frailty models for survival data. *Lifetime Data Anal* 1995;**1**(3):255-73.  
18 422 24. Thomas MJ, Roddy E, Rathod T, et al. Clinical diagnosis of symptomatic midfoot  
19 423 osteoarthritis: cross-sectional findings from the Clinical Assessment Study of the  
20 424 Foot. *Osteoarthritis and cartilage / OARS, Osteoarthritis Research Society*  
21 425 2015;**23**(12):2094-101.  
22 426 25. Healey EL, Main CJ, Ryan S, et al. A nurse-led clinic for patients consulting with  
23 427 osteoarthritis in general practice: development and impact of training in a cluster  
24 428 randomised controlled trial. *BMC Fam Pract* 2016;**17**(1):173.

27  
28 429  
29  
30  
31  
32  
33  
34  
35  
36  
37  
38  
39  
40  
41  
42  
43  
44  
45  
46  
47  
48  
49  
50  
51  
52  
53  
54  
55  
56  
57  
58  
59  
60

**Table 1:** Quality Indicators and categories used for latent class analysis

| Quality Indicator               | Categories                     | Definition                                                                                             |
|---------------------------------|--------------------------------|--------------------------------------------------------------------------------------------------------|
| Pain Assessed                   | Assessed                       | Recorded level of pain <sup>a</sup>                                                                    |
|                                 | Not Assessed                   | No entry recorded <sup>a</sup>                                                                         |
| Function Assessed               | Assessed                       | Recorded level of function <sup>a</sup>                                                                |
|                                 | Not Assessed                   | No entry recorded <sup>a</sup>                                                                         |
| OA Information                  | Given                          | Recorded written or verbal <sup>a</sup>                                                                |
|                                 | Considered, but Not Given      | Recorded not appropriate <sup>a</sup>                                                                  |
|                                 | Not Considered                 | No entry recorded <sup>a</sup>                                                                         |
| Exercise Advice                 | Given                          | Recorded written or verbal <sup>a</sup>                                                                |
|                                 | Considered, but Not Given      | Recorded not appropriate <sup>a</sup>                                                                  |
|                                 | Not Considered                 | No entry recorded <sup>a</sup>                                                                         |
| Weight loss Advice <sup>c</sup> | Given                          | Recorded written or verbal <sup>a</sup>                                                                |
|                                 | Considered, but Not Given      | Recorded not appropriate <sup>a</sup>                                                                  |
|                                 | Not Considered                 | No entry recorded <sup>a</sup>                                                                         |
| Paracetamol or Topical NSAID    | Prescribed                     | Either drug prescribed <sup>b</sup>                                                                    |
|                                 | Considered, but Not Prescribed | Neither drug prescribed but recorded tried, offered, patient declined, or not appropriate <sup>a</sup> |
|                                 | Not Considered                 | Neither drug prescribed, recorded unknown or no entry recorded for both drugs <sup>a</sup>             |
| Physiotherapy                   | Referred                       | Recorded referral <sup>b</sup>                                                                         |
|                                 | Considered, but Not Referred   | No referral but recorded as offered, or not necessary or not appropriate <sup>a</sup>                  |
|                                 | Not Considered                 | No referral, recorded not this time or no entry recorded <sup>a</sup>                                  |

<sup>a</sup> from e-template; <sup>b</sup> from routine records; <sup>c</sup> patients without a recorded BMI of  $\geq 25$  within the last 3 years were allocated to "Considered, but not given" category

**Table 2:** Latent class analysis goodness of fit statistics

| Number of clusters | BIC      | $\chi^2$ goodness of fit | Population (%) of smallest cluster | Range of mean PP across clusters | <i>n</i> (%) with PP<0.7 |
|--------------------|----------|--------------------------|------------------------------------|----------------------------------|--------------------------|
| 1                  | 20994.14 | 32978.08                 | 1724 (100)                         | 1.000                            | 0 (0)                    |
| 2                  | 15160.57 | 3332.77                  | 1071 (62)                          | 0.992, 0.987                     | 3 (<1)                   |
| 3                  | 14715.82 | 1727.74                  | 430 (25)                           | 0.906, 0.991                     | 138 (8)                  |
| 4                  | 14627.48 | 1522.28                  | 184 (11)                           | 0.848, 0.994                     | 157 (9)                  |
| 5                  | 14661.55 | 809.88                   | 142 (8)                            | 0.830, 0.993                     | 207 (12)                 |
| 6                  | 14699.79 | 733.23                   | 112 (6)                            | 0.754, 0.996                     | 257 (15)                 |
| 7                  | 14771.09 | 818.78                   | 22 (1)                             | 0.701, 0.996                     | 267 (15)                 |

BIC: Bayesian Information Criterion; PP: posterior probability

**Table 3:** Conditional item response probabilities for the quality indicators for each cluster

|                                                          |                            | Overall<br><i>n</i> (%) | Cluster                                 |                                             |                                        |                                         |
|----------------------------------------------------------|----------------------------|-------------------------|-----------------------------------------|---------------------------------------------|----------------------------------------|-----------------------------------------|
| Quality Indicators                                       |                            |                         | <i>High</i><br>( <i>n</i> =659,<br>38%) | <i>Moderate</i><br>( <i>n</i> =184,<br>11%) | <i>Low</i><br>( <i>n</i> =286,<br>17%) | <i>None</i><br>( <i>n</i> =595,<br>35%) |
| Pain Assessment                                          | Assessed                   | 1092 (63)               | 0.978                                   | 0.961                                       | 0.922                                  | 0.014                                   |
|                                                          | Not Assessed               | 632 (37)                | 0.022                                   | 0.039                                       | 0.078                                  | 0.987                                   |
| Function Assessment                                      | Assessed                   | 1070 (62)               | 0.981                                   | 0.955                                       | 0.873                                  | 0.000                                   |
|                                                          | Not Assessed               | 654 (38)                | 0.019                                   | 0.045                                       | 0.127                                  | 1.000                                   |
| OA Information                                           | Given                      | 764 (44)                | 0.930                                   | 0.463                                       | 0.319                                  | 0.001                                   |
|                                                          | Considered, Not Given      | 85 (5)                  | 0.009                                   | 0.330                                       | 0.011                                  | 0.000                                   |
|                                                          | Not Considered             | 875 (51)                | 0.062                                   | 0.207                                       | 0.670                                  | 1.000                                   |
| Exercise Advice                                          | Given                      | 768 (45)                | 0.994                                   | 0.417                                       | 0.237                                  | 0.000                                   |
|                                                          | Considered, Not Given      | 96 (6)                  | 0.007                                   | 0.313                                       | 0.067                                  | 0.000                                   |
|                                                          | Not Considered             | 860 (50)                | 0.000                                   | 0.270                                       | 0.696                                  | 1.000                                   |
| Weight Advice                                            | Given                      | 536 (31)                | 0.593                                   | 0.115                                       | 0.089                                  | 0.000                                   |
|                                                          | Considered, Not Given      | 153 (9)                 | 0.298                                   | 0.733                                       | 0.347                                  | 0.441                                   |
|                                                          | Not Considered             | 1035 (60)               | 0.109                                   | 0.152                                       | 0.564                                  | 0.559                                   |
| Topical NSAID/<br>paracetamol                            | Prescribed                 | 609 (35)                | 0.476                                   | 0.273                                       | 0.394                                  | 0.239                                   |
|                                                          | Considered, Not Prescribed | 570 (33)                | 0.496                                   | 0.641                                       | 0.406                                  | 0.004                                   |
|                                                          | Not Considered             | 545 (32)                | 0.028                                   | 0.086                                       | 0.200                                  | 0.757                                   |
| Physiotherapy                                            | Referred                   | 124 (7)                 | 0.111                                   | 0.037                                       | 0.101                                  | 0.032                                   |
|                                                          | Considered, Not Referred   | 532 (31)                | 0.559                                   | 0.732                                       | 0.080                                  | 0.000                                   |
|                                                          | Not Considered             | 1068 (62)               | 0.330                                   | 0.230                                       | 0.819                                  | 0.968                                   |
| Median count (IQR)<br>Assessed/prescribed/given/referred |                            |                         | 5 (4, 6)                                | 3 (2, 3)                                    | 3 (2, 3)                               | 0 (0, 1)                                |
| Median count (IQR) Considered                            |                            |                         | 1 (1, 2)                                | 3 (2, 4)                                    | 1 (0, 1)                               | 0 (0, 1)                                |



**Table 4:** Patient and clinician characteristics for each cluster

|                                                   |                  | Total <i>n</i><br>(%) | Cluster                         |                                     |                                |                                 |
|---------------------------------------------------|------------------|-----------------------|---------------------------------|-------------------------------------|--------------------------------|---------------------------------|
|                                                   |                  |                       | <i>High</i><br>( <i>n</i> =659) | <i>Moderate</i><br>( <i>n</i> =184) | <i>Low</i><br>( <i>n</i> =286) | <i>None</i><br>( <i>n</i> =595) |
| Age:                                              | 45-64            | 817                   | 277 (34)                        | 109 (13)                            | 293 (43)                       | 138 (17)                        |
|                                                   | 65-74            | 442                   | 213 (48)                        | 20 (5)                              | 144 (33)                       | 65 (15)                         |
|                                                   | 75-84            | 349                   | 133 (38)                        | 35 (10)                             | 116 (33)                       | 65 (19)                         |
|                                                   | 85+              | 116                   | 36 (31)                         | 20 (17)                             | 42 (36)                        | 18 (6)                          |
| Gender:                                           | Male             | 710                   | 286 (40)                        | 68 (10)                             | 113 (16)                       | 243 (34)                        |
|                                                   | Female           | 1014                  | 373 (37)                        | 116 (11)                            | 173 (17)                       | 352 (35)                        |
| BMI category:                                     |                  |                       |                                 |                                     |                                |                                 |
|                                                   | Normal           | 315                   | 111 (35)                        | 54 (17)                             | 48 (15)                        | 102 (32)                        |
|                                                   | Overweight       | 1080                  | 471 (44)                        | 83 (8)                              | 193 (18)                       | 333 (31)                        |
|                                                   | Not recorded     | 329                   | 77 (23)                         | 47 (14)                             | 45 (14)                        | 160 (49)                        |
| Recorded joint pain only                          |                  | 1142                  | 366 (32)                        | 148 (13)                            | 207 (18)                       | 421 (37)                        |
| OA diagnosis                                      |                  | 582                   | 293 (50)                        | 36 (6)                              | 79 (14)                        | 174 (30)                        |
| Site of OA:                                       |                  |                       |                                 |                                     |                                |                                 |
|                                                   | Knee             | 855                   | 359 (42)                        | 80 (9)                              | 149 (17)                       | 267 (31)                        |
|                                                   | Hip              | 363                   | 135 (37)                        | 41 (11)                             | 68 (19)                        | 119 (33)                        |
|                                                   | Foot             | 125                   | 30 (24)                         | 15 (12)                             | 10 (8)                         | 70 (56)                         |
|                                                   | Hand             | 152                   | 33 (22)                         | 25 (16)                             | 31 (20)                        | 63 (41)                         |
|                                                   | Unspecified      | 99                    | 30 (30)                         | 8 (8)                               | 16 (16)                        | 45 (46)                         |
|                                                   | Multiple         | 130                   | 72 (55)                         | 15 (12)                             | 12 (9)                         | 31 (24)                         |
| Morbidity load <sup>a</sup> :                     |                  |                       |                                 |                                     |                                |                                 |
| BNF count                                         | 0-4              | 485                   | 156 (32)                        | 68 (14)                             | 89 (18)                        | 172 (36)                        |
|                                                   | 5-9              | 578                   | 240 (42)                        | 56 (10)                             | 99 (17)                        | 183 (32)                        |
|                                                   | 10+              | 661                   | 263 (40)                        | 60 (9)                              | 98 (15)                        | 240 (36)                        |
| Clinician OA workload <sup>b</sup> :              |                  |                       |                                 |                                     |                                |                                 |
|                                                   | Below the median | 197                   | 41 (21)                         | 16 (8)                              | 36 (18)                        | 104 (53)                        |
|                                                   | Above the median | 1527                  | 618 (41)                        | 168 (11)                            | 250 (16)                       | 491 (32)                        |
| Median (IQR) no. of OA consultations <sup>b</sup> |                  | 1 (0, 1)              | 1 (1, 2)                        | 1 (1, 2)                            | 1 (1, 2)                       | 1 (1, 1)                        |
| OA consultations <sup>b</sup> :                   |                  |                       |                                 |                                     |                                |                                 |
|                                                   | Multiple         | 532                   | 250 (47)                        | 63 (12)                             | 99 (19)                        | 120 (23)                        |
|                                                   | Single           | 1192                  | 409 (34)                        | 121 (10)                            | 187 (16)                       | 475 (40)                        |
| Consulter status:                                 |                  |                       |                                 |                                     |                                |                                 |
|                                                   | Repeat           | 566                   | 232 (41)                        | 53 (9)                              | 84 (15)                        | 197 (35)                        |
|                                                   | New <sup>c</sup> | 1158                  | 427 (37)                        | 131 (11)                            | 202 (17)                       | 398 (34)                        |

<sup>a</sup> Number of BNF sections from which prescription was made in previous 12 months; <sup>b</sup> during six month period; <sup>c</sup> no clinical OA consultations within the previous 12 months

**Table 5:** Associations of patient and clinician characteristics with cluster membership

| <i>n</i> = 1724                      |                  | <i>High vs None</i><br>RRR <sup>a</sup> (95% CI) | <i>Moderate vs None</i><br>RRR <sup>a</sup> (95% CI) | <i>Low vs None</i><br>RRR <sup>a</sup> (95% CI) |
|--------------------------------------|------------------|--------------------------------------------------|------------------------------------------------------|-------------------------------------------------|
| Age:                                 | 45-64            | 1                                                | 1                                                    | 1                                               |
|                                      | 65-74            | 1.41 (1.07, 1.84)                                | 0.45 (0.27, 0.74)                                    | 0.97 (0.69, 1.37)                               |
|                                      | 75-84            | 1.13 (0.83, 1.52)                                | 1.02 (0.65, 1.60)                                    | 1.42 (0.99, 2.05)                               |
|                                      | 85+              | 0.91 (0.56, 1.47)                                | 1.56 (0.85, 2.89)                                    | 1.24 (0.69, 2.23)                               |
| Gender:                              | Male             | 1                                                | 1                                                    | 1                                               |
|                                      | Female           | 0.86 (0.69, 1.07)                                | 1.03 (0.75, 1.43)                                    | 1.04 (0.80, 1.36)                               |
| BMI category:                        | Normal           | 1                                                | 1                                                    | 1                                               |
|                                      | Overweight       | 1.20 (0.91, 1.60)                                | 0.57 (0.39, 0.85)                                    | 1.33 (0.93, 1.90)                               |
|                                      | Not recorded     | 0.39 (0.27, 0.56)                                | 0.52 (0.33, 0.81)                                    | 0.52 (0.33, 0.82)                               |
| Recorded joint pain only             |                  | 1                                                | 1                                                    | 1                                               |
|                                      | OA diagnosis     | 1.81 (1.41, 2.32)                                | 0.55 (0.35, 0.85)                                    | 0.93 (0.68, 1.29)                               |
| Site of OA:                          | Knee             | 1                                                | 1                                                    | 1                                               |
|                                      | Hip              | 0.86 (0.66, 1.14)                                | 1.14 (0.76, 1.71)                                    | 1.04 (0.75, 1.44)                               |
|                                      | Foot             | 0.38 (0.24, 0.60)                                | 0.73 (0.39, 1.36)                                    | 0.25 (0.13, 0.51)                               |
|                                      | Hand             | 0.45 (0.30, 0.70)                                | 1.18 (0.70, 1.98)                                    | 0.88 (0.56, 1.39)                               |
|                                      | Unspecified      | 0.48 (0.30, 0.80)                                | 0.85 (0.38, 1.90)                                    | 0.74 (0.41, 1.34)                               |
|                                      | Multiple         | 1.13 (0.75, 1.74)                                | 1.89 (0.99, 3.59)                                    | 0.65 (0.34, 1.24)                               |
| Morbidity load <sup>b</sup> :        |                  |                                                  |                                                      |                                                 |
| BNF count                            | 0-4              | 1                                                | 1                                                    | 1                                               |
|                                      | 5-9              | 0.95 (0.71, 1.26)                                | 0.74 (0.50, 1.11)                                    | 0.75 (0.54, 1.06)                               |
|                                      | 10+              | 0.64 (0.47, 0.87)                                | 0.55 (0.35, 0.86)                                    | 0.50 (0.35, 0.73)                               |
| Clinician OA workload <sup>c</sup> : |                  |                                                  |                                                      |                                                 |
|                                      | Below the median | 1                                                | 1                                                    | 1                                               |
|                                      | Above the median | 2.90 (1.98, 4.25)                                | 2.32 (1.33, 4.03)                                    | 1.46 (0.98, 2.18)                               |
| OA consultations <sup>c</sup> :      |                  |                                                  |                                                      |                                                 |
|                                      | Multiple         | 1                                                | 1                                                    | 1                                               |
|                                      | Single           | 0.43 (0.34, 0.54)                                | 0.47 (0.33, 0.66)                                    | 0.45 (0.34, 0.60)                               |
| Consulter status:                    | Repeat           | 1                                                | 1                                                    | 1                                               |
|                                      | New <sup>d</sup> | 1.12 (0.89, 1.41)                                | 1.09 (0.76, 1.55)                                    | 1.18 (0.88, 1.59)                               |

<sup>a</sup> Relative risk ratio from multilevel multinomial regression (patients within initial clinician seen) adjusted for all presented covariates, *None* cluster is reference; <sup>b</sup> Number of BNF sections from which prescription was made in previous 12 months; <sup>c</sup> during six month period;

<sup>d</sup> no clinical OA consultations within the previous 12 month

**Table 6:** Use of management processes other than those used as quality indicators, and recorded severity of pain and functional limitation, by cluster

| <i>n</i> (column %)           | Cluster               |                          |                              |                         |                          | <i>p</i> -value <sup>a</sup> |
|-------------------------------|-----------------------|--------------------------|------------------------------|-------------------------|--------------------------|------------------------------|
|                               | Total<br><i>n</i> (%) | High<br>( <i>n</i> =659) | Moderate<br>( <i>n</i> =184) | Low<br>( <i>n</i> =286) | None<br>( <i>n</i> =595) |                              |
| Opioid Prescribed             | 557 (33)              | 236 (36)                 | 54 (29)                      | 94 (33)                 | 173 (29)                 | 0.06                         |
| Oral NSAID Prescribed         | 284 (17)              | 130 (20)                 | 21 (11)                      | 49 (17)                 | 84 (14)                  | 0.01                         |
| X-ray Requested               | 263 (15)              | 142 (22)                 | 30 (16)                      | 52 (18)                 | 39 (7)                   | <0.01                        |
| <i>n</i> with pain record     | 1092                  | 645                      | 177                          | 263                     | 7                        | 0.001 <sup>b</sup>           |
| No pain                       | 16 (1)                | 4 (<1)                   | 7 (4)                        | 4 (2)                   | 1                        |                              |
| Mild pain                     | 348 (32)              | 187 (29)                 | 69 (39)                      | 91 (35)                 | 1                        |                              |
| Moderate pain                 | 582 (53)              | 357 (55)                 | 84 (47)                      | 136 (52)                | 5                        |                              |
| Severe pain                   | 146 (13)              | 97 (15)                  | 17 (10)                      | 32 (12)                 | 0                        |                              |
| <i>n</i> with function record | 1070                  | 646                      | 174                          | 250                     | 0                        | 0.004 <sup>b</sup>           |
| No limitation                 | 101 (9)               | 46 (7)                   | 29 (16)                      | 26 (10)                 | 0                        |                              |
| Mild limitation               | 456 (43)              | 276 (43)                 | 73 (42)                      | 107 (43)                | 0                        |                              |
| Moderate limitation           | 427 (40)              | 277 (43)                 | 57 (33)                      | 93 (37)                 | 0                        |                              |
| Severe limitation             | 86 (8)                | 47 (7)                   | 15 (9)                       | 24 (10)                 | 0                        |                              |

<sup>a</sup> $\chi^2$  test, <sup>b</sup> excluding *None* cluster

## STROBE Statement—checklist of items that should be included in reports of observational studies

|                              | Item No | Recommendation                                                                                                                                                                                                                                                                                                                                                                                                                                                         | Page                                                                           |
|------------------------------|---------|------------------------------------------------------------------------------------------------------------------------------------------------------------------------------------------------------------------------------------------------------------------------------------------------------------------------------------------------------------------------------------------------------------------------------------------------------------------------|--------------------------------------------------------------------------------|
| <b>Title and abstract</b>    | 1       | (a) Indicate the study's design with a commonly used term in the title or the abstract                                                                                                                                                                                                                                                                                                                                                                                 | Title upload                                                                   |
|                              |         | (b) Provide in the abstract an informative and balanced summary of what was done and what was found                                                                                                                                                                                                                                                                                                                                                                    | Abstract upload                                                                |
| <b>Introduction</b>          |         |                                                                                                                                                                                                                                                                                                                                                                                                                                                                        |                                                                                |
| Background/rationale         | 2       | Explain the scientific background and rationale for the investigation being reported                                                                                                                                                                                                                                                                                                                                                                                   | 2                                                                              |
| Objectives                   | 3       | State specific objectives, including any prespecified hypotheses                                                                                                                                                                                                                                                                                                                                                                                                       | 2                                                                              |
| <b>Methods</b>               |         |                                                                                                                                                                                                                                                                                                                                                                                                                                                                        |                                                                                |
| Study design                 | 4       | Present key elements of study design early in the paper                                                                                                                                                                                                                                                                                                                                                                                                                | 2-3                                                                            |
| Setting                      | 5       | Describe the setting, locations, and relevant dates, including periods of recruitment, exposure, follow-up, and data collection                                                                                                                                                                                                                                                                                                                                        | 3                                                                              |
| Participants                 | 6       | (a) <i>Cohort study</i> —Give the eligibility criteria, and the sources and methods of selection of participants. Describe methods of follow-up<br><i>Case-control study</i> —Give the eligibility criteria, and the sources and methods of case ascertainment and control selection. Give the rationale for the choice of cases and controls<br><i>Cross-sectional study</i> —Give the eligibility criteria, and the sources and methods of selection of participants | 3                                                                              |
|                              |         | (b) <i>Cohort study</i> —For matched studies, give matching criteria and number of exposed and unexposed<br><i>Case-control study</i> —For matched studies, give matching criteria and the number of controls per case                                                                                                                                                                                                                                                 | N/A                                                                            |
| Variables                    | 7       | Clearly define all outcomes, exposures, predictors, potential confounders, and effect modifiers. Give diagnostic criteria, if applicable                                                                                                                                                                                                                                                                                                                               | 3-5                                                                            |
| Data sources/<br>measurement | 8*      | For each variable of interest, give sources of data and details of methods of assessment (measurement). Describe comparability of assessment methods if there is more than one group                                                                                                                                                                                                                                                                                   | 3-5                                                                            |
| Bias                         | 9       | Describe any efforts to address potential sources of bias                                                                                                                                                                                                                                                                                                                                                                                                              | 3                                                                              |
| Study size                   | 10      | Explain how the study size was arrived at                                                                                                                                                                                                                                                                                                                                                                                                                              | N/A (sample size calculation was for the clinical outcomes reported elsewhere) |
| Quantitative variables       | 11      | Explain how quantitative variables were handled in the analyses. If applicable, describe which groupings were chosen and why                                                                                                                                                                                                                                                                                                                                           | 4-5                                                                            |
| Statistical methods          | 12      | (a) Describe all statistical methods, including those used                                                                                                                                                                                                                                                                                                                                                                                                             | 5-6                                                                            |

1  
2 to control for confounding

3 (b) Describe any methods used to examine subgroups N/A  
4 and interactions

5 (c) Explain how missing data were addressed 4

6 (d) *Cohort study*—If applicable, explain how loss to N/A  
7 follow-up was addressed

8 *Case-control study*—If applicable, explain how  
9 matching of cases and controls was addressed

10 *Cross-sectional study*—If applicable, describe analytical  
11 methods taking account of sampling strategy

12  
13  
14 (e) Describe any sensitivity analyses N/A

15 Continued on next page

16  
17  
18  
19  
20  
21  
22  
23  
24  
25  
26  
27  
28  
29  
30  
31  
32  
33  
34  
35  
36  
37  
38  
39  
40  
41  
42  
43  
44  
45  
46  
47  
48  
49  
50  
51  
52  
53  
54  
55  
56  
57  
58  
59  
60

For peer review only

| <b>Results</b>           |     | <b>Page</b>                                                                                                                                                                                                  |            |
|--------------------------|-----|--------------------------------------------------------------------------------------------------------------------------------------------------------------------------------------------------------------|------------|
| Participants             | 13* | (a) Report numbers of individuals at each stage of study—eg numbers potentially eligible, examined for eligibility, confirmed eligible, included in the study, completing follow-up, and analysed            | 6          |
|                          |     | (b) Give reasons for non-participation at each stage                                                                                                                                                         | N/A        |
|                          |     | (c) Consider use of a flow diagram                                                                                                                                                                           | N/A        |
| Descriptive data         | 14* | (a) Give characteristics of study participants (eg demographic, clinical, social) and information on exposures and potential confounders                                                                     | Table 4    |
|                          |     | (b) Indicate number of participants with missing data for each variable of interest                                                                                                                          | N/A        |
|                          |     | (c) <i>Cohort study</i> —Summarise follow-up time (eg, average and total amount)                                                                                                                             | N/A        |
| Outcome data             | 15* | <i>Cohort study</i> —Report numbers of outcome events or summary measures over time                                                                                                                          | N/A        |
|                          |     | <i>Case-control study</i> —Report numbers in each exposure category, or summary measures of exposure                                                                                                         | N/A        |
|                          |     | <i>Cross-sectional study</i> —Report numbers of outcome events or summary measures                                                                                                                           | Table 3    |
| Main results             | 16  | (a) Give unadjusted estimates and, if applicable, confounder-adjusted estimates and their precision (eg, 95% confidence interval). Make clear which confounders were adjusted for and why they were included | Table 5    |
|                          |     | (b) Report category boundaries when continuous variables were categorized                                                                                                                                    | Table 4, 5 |
|                          |     | (c) If relevant, consider translating estimates of relative risk into absolute risk for a meaningful time period                                                                                             | N/A        |
| Other analyses           | 17  | Report other analyses done—eg analyses of subgroups and interactions, and sensitivity analyses                                                                                                               | N/A        |
| <b>Discussion</b>        |     |                                                                                                                                                                                                              |            |
| Key results              | 18  | Summarise key results with reference to study objectives                                                                                                                                                     | 8-9        |
| Limitations              | 19  | Discuss limitations of the study, taking into account sources of potential bias or imprecision. Discuss both direction and magnitude of any potential bias                                                   | 11         |
| Interpretation           | 20  | Give a cautious overall interpretation of results considering objectives, limitations, multiplicity of analyses, results from similar studies, and other relevant evidence                                   | 12         |
| Generalisability         | 21  | Discuss the generalisability (external validity) of the study results                                                                                                                                        | 12         |
| <b>Other information</b> |     |                                                                                                                                                                                                              |            |
| Funding                  | 22  | Give the source of funding and the role of the funders for the present study and, if applicable, for the original study on which the present article is based                                                | 13         |

\*Give information separately for cases and controls in case-control studies and, if applicable, for exposed and unexposed groups in cohort and cross-sectional studies.

**Note:** An Explanation and Elaboration article discusses each checklist item and gives methodological background and published examples of transparent reporting. The STROBE checklist is best used in conjunction with this article (freely available on the Web sites of PLoS Medicine at <http://www.plosmedicine.org/>, Annals of Internal Medicine at <http://www.annals.org/>, and Epidemiology at <http://www.epidem.com/>). Information on the STROBE Initiative is available at [www.strobe-statement.org](http://www.strobe-statement.org).

# BMJ Open

## Patterns of routine primary care for osteoarthritis in the UK: a cross-sectional electronic health records study

|                                 |                                                                                                                                                                                                                                                                                                                                                                                                                                                                                                                                                                                                                                                                                                                                                                                                                                                                                                        |
|---------------------------------|--------------------------------------------------------------------------------------------------------------------------------------------------------------------------------------------------------------------------------------------------------------------------------------------------------------------------------------------------------------------------------------------------------------------------------------------------------------------------------------------------------------------------------------------------------------------------------------------------------------------------------------------------------------------------------------------------------------------------------------------------------------------------------------------------------------------------------------------------------------------------------------------------------|
| Journal:                        | <i>BMJ Open</i>                                                                                                                                                                                                                                                                                                                                                                                                                                                                                                                                                                                                                                                                                                                                                                                                                                                                                        |
| Manuscript ID                   | bmjopen-2017-019694.R1                                                                                                                                                                                                                                                                                                                                                                                                                                                                                                                                                                                                                                                                                                                                                                                                                                                                                 |
| Article Type:                   | Research                                                                                                                                                                                                                                                                                                                                                                                                                                                                                                                                                                                                                                                                                                                                                                                                                                                                                               |
| Date Submitted by the Author:   | 22-Nov-2017                                                                                                                                                                                                                                                                                                                                                                                                                                                                                                                                                                                                                                                                                                                                                                                                                                                                                            |
| Complete List of Authors:       | Jackson, Holly; Keele University, Research Institute for Primary Care and Health Sciences; University of Nottingham, School of Mathematical Sciences<br>Barnett, Lauren; Keele University, Arthritis Research UK Primary Care Centre<br>Jordan, Kelvin; Keele University, Arthritis Research UK Primary Care Centre; Keele Clinical Trials Unit, David Weatherall Building<br>Dziedzic, Krysia; Arthritis Research Campaign National Primary Care Centre<br>Cottrell, Elizabeth ; Keele University, Research Institute for Primary Care & Health Sciences<br>Finney, Andrew; Keele University, Research Institute for Primary Care and Health Sciences<br>Paskins, Zoe; Keele University, Arthritis Research UK Primary Care Centre, Research Institute for Primary Care & Health Sciences<br>Edwards, John; Keele University Faculty of Health, Research Institute for Primary Care & Health Sciences |
| <b>Primary Subject Heading</b>: | General practice / Family practice                                                                                                                                                                                                                                                                                                                                                                                                                                                                                                                                                                                                                                                                                                                                                                                                                                                                     |
| Secondary Subject Heading:      | Rheumatology                                                                                                                                                                                                                                                                                                                                                                                                                                                                                                                                                                                                                                                                                                                                                                                                                                                                                           |
| Keywords:                       | Osteoarthritis, PRIMARY CARE, Quality in health care < HEALTH SERVICES ADMINISTRATION & MANAGEMENT, Latent class analysis                                                                                                                                                                                                                                                                                                                                                                                                                                                                                                                                                                                                                                                                                                                                                                              |
|                                 |                                                                                                                                                                                                                                                                                                                                                                                                                                                                                                                                                                                                                                                                                                                                                                                                                                                                                                        |

SCHOLARONE™  
Manuscripts

1  
2  
3 **1 Patterns of routine primary care for osteoarthritis: a cross-sectional electronic health records**  
4  
5 **2 study**  
6

7 **3** H Jackson<sup>1,2</sup>, LA Barnett<sup>1</sup>, KP Jordan<sup>1,3</sup>, KS Dziedzic<sup>1</sup>, E Cottrell<sup>1</sup>, AG Finney<sup>1</sup>, Z Paskins<sup>1</sup>, JJ Edwards<sup>1</sup>  
8

9  
10 **4** H Jackson: holly@gigglane.com

11  
12 **5** LA Barnett: l.a.barnett@keele.ac.uk

13  
14 **6** KP Jordan: k.p.jordan@keele.ac.uk

15  
16 **7** KS Dziedzic: k.s.dziedzic@keele.ac.uk

17  
18 **8** E Cottrell: e.cottrell@keele.ac.uk

19  
20 **9** AG Finney: a.finney@keele.ac.uk

21  
22 **10** Z Paskins: z.paskins@keele.ac.uk

23  
24 **11** JJ Edwards: j.j.edwards@keele.ac.uk

25  
26 **12** <sup>1</sup>Keele University Research Institute for Primary Care and Health Sciences; <sup>2</sup>University of  
27  
28 **13** Nottingham School of Mathematical Sciences; <sup>3</sup>Keele Clinical Trials Unit, David Weatherall Building,  
29  
30 **14** Keele University, Staffordshire, ST5 5BG  
31  
32

33  
34  
35  
36 **15**

37  
38 **16** Correspondence to: Dr John Edwards, Arthritis Research UK Primary Care Centre,  
39  
40 **17** Research Institute for Primary Care & Health Sciences, Keele University,  
41  
42 **18** Staffordshire, ST5 5BG; e-mail: [j.j.edwards@keele.ac.uk](mailto:j.j.edwards@keele.ac.uk); tel. +44 (0) 1782 733977; fax.: +44 (0) 1782  
43  
44 **19** 734719

45  
46  
47 **20** Word count: 3424

48  
49  
50 **21** Running title: Patterns of primary care for osteoarthritis  
51  
52  
53  
54  
55  
56  
57  
58  
59  
60



1  
2  
3 **22 Abstract**

4  
5 **23 Objective**

6  
7 24 To determine common patterns of recorded primary care for osteoarthritis (OA), and patient and  
8  
9 25 provider characteristics associated with the quality of recorded care.

10  
11  
12 **26 Design**

13  
14 27 An observational study nested within a cluster-randomised controlled trial.

15  
16  
17 **28 Setting**

18  
19 29 Eight UK general practices who were part of the Management of OsteoArthritis In ConsultationS  
20  
21 30 (MOSAICS) study.

22  
23  
24 **31 Participants**

25  
26 32 Patients recorded as consulting within the eight general practices for clinical OA.

27  
28 **33 Primary outcomes**

29  
30 34 Achievement of seven quality indicators of care (pain/function assessment, information provision,  
31  
32 35 exercise/weight advice, analgesics, physiotherapy), recorded through an electronic template or  
33  
34 36 routinely-recorded in the electronic healthcare records, were identified for patients aged  $\geq 45$  years  
35  
36 37 consulting over a six-month period with clinical OA. Latent class analysis was used to cluster  
37  
38 38 patients based on care received. Clusters were compared on patient and clinician-level  
39  
40 39 characteristics.

41  
42  
43  
44 **40 Results**

45  
46 41 1724 patients (median by practice 183) consulted with clinical OA. Common patterns of recorded  
47  
48 42 quality care were: Cluster 1 (38%, *High*) received most quality indicators of care; Cluster 2 (11%,  
49  
50 43 *Moderate*) had pain and function assessment, and received or were considered for other indicators;  
51  
52 44 Cluster 3 (17%, *Low*) had pain and function assessment, and received or were considered for  
53  
54 45 paracetamol or topical NSAIDs; Cluster 4 (35%, *None*) had no recorded quality indicators. Patients  
55  
56  
57  
58  
59  
60

1  
2  
3 46 with higher levels of recorded care consulted a clinician who saw more OA patients, consulted  
4  
5 47 multiple times, and had less morbidity. Those in the *High* cluster were more likely to have recorded  
6  
7 48 diagnosed OA and have knee/hip OA.

## 9 49 **Conclusions**

10 50 Patterns of recorded care for OA fell into four natural clusters. Appropriate delivery of core  
11  
12 51 interventions and relatively safe pharmacological options for OA are still not consistently recorded  
13  
14 52 as provided in primary care. Further research to understand clinical recording behaviours and  
15  
16 53 determine potential barriers to quality care alongside effective training for clinicians is needed.

17  
18  
19 54 **Trial registration number:** ISRCTN06984617

## 20 55 **Keywords**

21 56 Osteoarthritis, primary care, quality indicators, latent class analysis

## 22 57 **Article summary**

- 23  
24  
25  
26  
27  
28  
29  
30 58 • This paper describes a novel use of latent class analysis to identify patterns of primary care  
31  
32 59 for osteoarthritis (OA)
- 33  
34  
35  
36 60 • The population studied was large and diverse, increasing generalisability, and based on a  
37  
38 61 broad definition of clinical OA to reduce selection bias
- 39  
40  
41 62 • The analysis used some quality indicators of care newly-implemented in practices through  
42  
43 63 an electronic template (pain/function assessment, information provision, exercise/weight  
44  
45 64 advice, analgesics, physiotherapy), which may have increased the recorded quality of care  
46  
47 65 compared to routine practice
- 48  
49  
50  
51 66 • Four clusters of recorded care were identified: approximately one-third of patients had a  
52  
53 67 high probability of delivery of most care processes whilst another third had a low probability  
54  
55 68 of any such delivery. The remaining patients had a high probability of pain and function

1  
2  
3 69 assessment but were distinguished by the probability of delivery or consideration of other  
4  
5 70 aspects of care.  
6  
7

8 71 **Word count 3582**  
9  
10  
11  
12  
13  
14  
15  
16  
17  
18  
19  
20  
21  
22  
23  
24  
25  
26  
27  
28  
29  
30  
31  
32  
33  
34  
35  
36  
37  
38  
39  
40  
41  
42  
43  
44  
45  
46  
47  
48  
49  
50  
51  
52  
53  
54  
55  
56  
57  
58  
59  
60

## 72 Introduction

73 Osteoarthritis (OA) is a common reason for adults aged  $\geq 45$  years to consult primary care. Annually,  
74 in the UK, 4% of such adults are recorded as consulting in general practice for diagnosed OA, with  
75 an additional 8% recorded with joint pain likely to be attributable to OA [1]. Osteoarthritis is a  
76 common reason for disability, and was ranked the 11<sup>th</sup> biggest cause of disability by the 2010  
77 Global Burden of Disease (GBD) [2].

78 The UK National Institute for Health and Care Excellence (NICE) OA management guidelines  
79 recommend core strategies of information provision, physical activity and exercise, and weight  
80 management, supplemented with use of relatively safe pharmacological management strategies  
81 (for example, topical non-steroidal anti-inflammatory drugs [NSAIDs]), as necessary [3].  
82 Intensification of management should depend on response to these initial approaches. However,  
83 there is evidence that patients diagnosed with OA do not receive care that is well aligned to  
84 evidence-based recommendations and which may be overly dependent on pharmacological  
85 methods [4].

86 We have previously identified variation between clinicians in recorded quality of individual  
87 indicators of OA care [5]. However, patterns of OA care and factors linked with increased  
88 probability of adherence to OA quality standards are less well-studied. Using electronic general  
89 practice records data, the objectives of this study were to determine patterns of recorded primary  
90 care for OA based on quality indicators, and to determine associations between higher-quality  
91 recorded care and patient and clinician characteristics.

## 92 Methods

93 This analysis used data from the Management of OsteoArthritis In ConsultationS (MOSAICS) study  
94 (Trial registration number ISRCTN06984617), approved by the North West Research Ethics

1  
2  
3 95 Committee, Cheshire (reference: 10/H1017/76) [6]. MOSAICS was a mixed-methods study, which  
4  
5 96 investigated the effect of a model consultation for clinical OA. It was set within eight general  
6  
7 97 practices in Cheshire, Shropshire and Staffordshire, UK. Practice eligibility has been reported  
8  
9 98 elsewhere [6]. The current analysis, reported in line with STROBE guidelines, used anonymised  
10  
11 99 information from the electronic health records (EHR) of these practices for the six-month baseline  
12  
13  
14 100 period before randomisation of practices to intervention or control arms [6]. At the beginning of  
15  
16 101 the baseline period, a computerised template (“e-template”, described below) was installed within  
17  
18 102 the EHR and all practices continued with otherwise usual care until the end of the baseline period.  
19  
20  
21  
22 103 The study population was all patients aged  $\geq 45$  years registered with the eight general practices  
23  
24 104 who consulted with clinical OA in the baseline six-month period. UK general practice utilises a  
25  
26 105 system of Read codes (similar in principle to the International Classification of Diseases codes) to  
27  
28 106 record symptoms, morbidities, and care processes [7]; within MOSAICS, clinical OA was defined as  
29  
30 107 either a recorded OA Read code or a peripheral joint pain Read code for the hand, hip, knee, or  
31  
32 108 foot, to reduce the potential for selection bias in clinician coding. Patients were allocated to an  
33  
34 109 index clinician, being the clinician recording the first formally diagnosed (i.e. OA Read-coded) OA  
35  
36 110 consultation in the baseline period or, if none, the first peripheral joint pain coded consultation in  
37  
38 111 the same period.  
39  
40  
41  
42  
43

44 112 Outcome measures were the seven indicators of quality of care for OA in general practice recorded  
45  
46 113 in the EHR (Table 1). These could be entered into the EHR as routinely-recorded data or captured  
47  
48 114 through the e-template. The identification and synthesis of appropriate quality indicators using a  
49  
50 115 systematic review and NICE 2008 guidelines has previously been reported [5,8,9].  
51  
52  
53

54 116 Achievement of prescribing and referral indicators (recorded prescription of topical NSAIDs or  
55  
56 117 paracetamol, and onward physiotherapy referral) were determined from data in the routinely-  
57  
58  
59  
60

1  
2  
3 118 recorded component of the EHR and were determined to have been achieved if they were recorded  
4  
5 119 within 14 days of any clinical OA consultation in the six-month period.  
6  
7

8 120 The e-template facilitated recording of achievement of indicators that are known to be poorly  
9  
10 121 captured in routinely-recorded data [5]: (i) assessment of pain and function, (ii) provision or  
11  
12 122 consideration of OA information, exercise advice, and weight loss advice, (iii) consideration of  
13  
14 123 paracetamol or topical NSAID and (iv) consideration of physiotherapy referral. The entry of a code  
15  
16 124 for clinical OA for a patient aged  $\geq 45$  years triggered the e-template. The design, interpretation, and  
17  
18 125 effects of the e-template have previously been reported [5]. The clinicians could complete the e-  
19  
20 126 template at any point throughout the consultation and could choose to complete all, some, or none  
21  
22 127 of the e-template. The e-template has been endorsed by NICE to facilitate enhanced uptake of  
23  
24 128 quality standards [10].  
25  
26  
27  
28  
29

30 129 Data from the EHR (derived from both routinely-recorded data and the e-template) were  
31  
32 130 amalgamated within the relevant quality indicator. For example, consideration of paracetamol and  
33  
34 131 topical NSAIDs (entered using e-template) was combined with actual prescription of these agents  
35  
36 132 (routinely-recorded data). Outcomes (Table 1) were dichotomous for pain and function  
37  
38 133 assessments. For all other indicators, the possibilities were for the indicator to be *achieved*,  
39  
40 134 *considered* (without record of having been delivered), or *not considered*. There is evidence that  
41  
42 135 weight recording is more common in people who are overweight compared to those who are not  
43  
44 136 [11]. To minimise the effect of missing data and to preserve the ability of the model to identify  
45  
46 137 people who needed weight loss advice but were not recorded as receiving it, any patient recorded  
47  
48 138 as being of normal weight or who did not have a weight recorded was allocated to *considered* for  
49  
50 139 weight loss advice.  
51  
52  
53  
54  
55  
56  
57  
58  
59  
60

1  
2  
3 140 We investigated how patterns of care based on the quality indicators were associated with other  
4  
5 141 OA care processes, recorded in the routine EHR within 14 days of any clinical OA consultation:  
6  
7 142 prescriptions for oral NSAIDs and opioids, and relevant X-rays (hand, hip knee, or foot).  
8  
9  
10 143 Factors potentially associated with patterns of quality of care that were considered were: patient  
11  
12 144 age, gender, body mass index (BMI), the site of clinical OA, whether patients had multiple or a  
13  
14 145 single consultation for clinical OA within the six-month time period, whether the patient was a new  
15  
16 146 consulter (no clinical OA consultations within the previous 12 months) and total morbidity. Total  
17  
18 147 morbidity was measured by a count of British National Formulary (BNF) subchapters from which  
19  
20 148 prescriptions had been issued in the previous 12 months [12]. A proxy measure of OA workload for  
21  
22 149 the patients' index clinician was determined by dichotomising the number of index clinical OA  
23  
24 150 consultations at the median value (14) across clinicians.  
25  
26  
27  
28  
29

### 30 Statistical analysis

31  
32 152 Latent class analysis (LCA) was used to cluster patients into groups based on recorded achievement  
33  
34 153 of the seven quality indicators. All patients within a cluster should have similar recorded care for  
35  
36 154 their OA or joint pain, but care should differ between patients belonging to different clusters [13].  
37  
38  
39  
40 155 Latent class models were fitted, beginning with a one-cluster model where all the patients were  
41  
42 156 assumed to have been given the same pattern of treatment of OA, up to a seven-cluster model. To  
43  
44 157 determine the optimum number of clusters, we considered the Bayes Information Criterion [14]  
45  
46 158 (BIC, whereby the lowest BIC indicated the best model) with the size of each cluster, and the  
47  
48 159 interpretability of the model. Posterior probabilities (PP) for a patient (the probabilities of that  
49  
50 160 patient belonging to each of the clusters within the model) were identified. The cluster that had the  
51  
52 161 largest PP for a patient was the cluster that patient was assigned to. We used the mean PP for  
53  
54  
55  
56  
57  
58  
59  
60

1  
2  
3 162 patients allocated to each cluster to measure cluster separation; a mean PP of more than 0.7  
4  
5 163 indicated that the patients were clearly assigned to that specific cluster [15].  
6  
7  
8 164 Using a two-level (patient within index clinician) multinomial multilevel logistic regression,  
9  
10 165 associations between the patient and clinician-level covariates and cluster membership were  
11  
12 166 estimated and reported as relative risk ratios (RRR) with 95% confidence intervals (CI). We also  
13  
14 167 used chi-squared tests to compare between clusters on levels of pain and functional limitation  
15  
16 168 (none, mild, moderate, severe) as recorded in the e-template.  
17  
18  
19  
20  
21 169 Statistical analysis was performed using R studio version 3.3.0, and MLwiN version 2.35 for  
22  
23 170 Windows.

## 26 171 **Results**

28 172 During the six-month period, 1724 patients (median per practice  $n=183$ ) consulted with a recorded  
29  
30 173 clinical OA code and triggered the e-template. All were included in the analysis. 1014 (59%) of these  
31  
32 174 were female, mean age was 66.1 years (SD: 11.9) and 582 (34%) patients were recorded with a  
33  
34 175 diagnosis of OA rather than peripheral joint pain. Among consulters, 50% were recorded as having  
35  
36 176 clinical OA at the knee, 21% at the hip, and the remainder with ankle/foot, wrist/hand, multisite, or  
37  
38 177 unspecified clinical OA.  
39  
40  
41  
42

43 178 As previously reported [5], pain (63%) and function (62%) assessment were the most commonly  
44  
45 179 achieved indicators. Recorded provision of OA information (44%), and exercise advice (45%) were  
46  
47 180 achieved in under half of patients, and weight loss advice in less than a third of patients (31%). 609  
48  
49 181 (35%) patients were prescribed paracetamol or topical NSAIDs. A referral for physiotherapy was  
50  
51 182 made in 7% of patients.  
52  
53  
54  
55  
56  
57  
58  
59  
60



1  
2  
3 183 Table 2 shows the goodness-of-fit statistics for the LCA models with one to seven clusters. The four-  
4  
5 184 cluster model gave the lowest BIC, and each of the clusters in the three-, four-, and five-cluster  
6  
7 185 models had a mean PP for patients belonging to that cluster above 0.83. In the three-cluster model  
8  
9 186 the smallest cluster size was 430 (25%), in the four-cluster model it was 184 (11%) and the five-  
10  
11 187 cluster model had a smallest cluster size of 142 (8%). Based on the cluster sizes, goodness-of-fit  
12  
13 188 statistics, and clinical interpretability, the four-cluster model was chosen as the optimal model.  
14  
15

16  
17 189 Table 3 shows the probability of recorded receipt of each of the seven quality indicators for  
18  
19 190 patients allocated to each cluster. Patients in cluster 1 ( $n=659$ , 38%) had a high probability of having  
20  
21 191 pain and function assessment recorded (probabilities over 0.97) and of being given OA information  
22  
23 192 and exercise advice (probabilities over 0.93). Patients' care within this cluster was recorded as  
24  
25 193 having achieved a median of five indicators and considered for, but not achieved, a median of one  
26  
27 194 further indicator. Cluster 1 was therefore labelled as having a *High* level of recorded quality of care.  
28  
29 195 Cluster 2 ( $n=184$ , 11%; *Moderate*) had a high probability of pain and function assessment  
30  
31 196 (probabilities over 0.95) and of consideration for (but not receipt of) physiotherapy and topical  
32  
33 197 NSAID or paracetamol. They also had a high probability of being given or considered for OA  
34  
35 198 information and exercise advice. Their recorded care achieved a median of three indicators and  
36  
37 199 they were considered for care relating to a median of three further indicators. Cluster 3 ( $n=286$ ,  
38  
39 200 17%; *Low*) had a high probability of pain and function assessment (probabilities over 0.87), and  
40  
41 201 were likely to be prescribed or considered for paracetamol or topical NSAIDs but generally were not  
42  
43 202 recorded as receiving or being considered for other indicators (received a median of three  
44  
45 203 processes and considered for a median of one further). Cluster 4 ( $n=595$ , 35%; *None*) had low  
46  
47 204 probabilities of a record of receiving or being considered for any indicator (received and considered  
48  
49 205 median zero indicators).  
50  
51  
52  
53  
54  
55  
56  
57  
58  
59  
60

1  
2  
3 206 Table 4 compares the number of people in each cluster who were expected, based on the model, to  
4  
5 207 receive each care process (identified by the indicators) and the number actually recorded as  
6  
7 208 receiving them. Differences between observed and expected values were small and generally  
8  
9 209 related to distinguishing between care received compared to care considered. For example, in the  
10  
11 210 pain assessment domain, there was no difference between the counts of observed and expected  
12  
13 211 provision for the *High* and *Moderate* clusters, and a difference of only one patient in the *Low* and  
14  
15 212 *None* clusters; for OA information provision, this was observed more frequently than expected for  
16  
17 213 the *High* cluster (observed n=620 compared to 613 expected) but less frequently for the *Moderate*  
18  
19 214 (59 vs. 85) and *Low* (85 vs. 91) clusters.

20  
21  
22  
23  
24 215 Patient and clinician characteristics for each cluster are shown in Table 5 with results from the  
25  
26 216 multinomial model comparing clusters in Table 6. Compared to the *None* cluster, patients in the  
27  
28 217 *High* and *Moderate* clusters tended to consult with a clinician with a higher OA workload, consult  
29  
30 218 multiple times, and have less total morbidity (Table 6). The patients with *High* level of recorded  
31  
32 219 care were more likely to have diagnosed OA (adjusted RRR 1.81, 95% CI 1.41, 2.32) and less likely to  
33  
34 220 have hand or foot clinical OA than patients in the *None* cluster, whilst patients in the *Moderate*  
35  
36 221 cluster were less likely to have diagnosed OA (RRR 0.55, 95% CI 0.35, 0.85) or be overweight (RRR  
37  
38 222 0.57, 95% CI 0.39, 0.85), but more likely to have clinical OA in multiple sites (RRR 1.89, 95% CI 0.99,  
39  
40 223 3.59) than patients in the *None* cluster. Patients in the *Low* cluster were less likely than patients in  
41  
42 224 the *None* cluster to have a single consultation (RRR 0.45, 95% CI 0.34, 0.60), have clinical OA in the  
43  
44 225 foot (RRR 0.25, 95% CI 0.13, 0.51), or have multimorbidity.

45  
46  
47  
48  
49  
50 226 Those in the *High* cluster had slightly higher levels of opioid prescription (36%; chi-squared test,  
51  
52 227  $p=0.06$ ), oral NSAID prescription (20%;  $p=0.01$ ), and recorded X-rays (22%;  $p<0.01$ ) than patients in

1  
2  
3 228 the other clusters, although differences between the *High* and *Low* clusters, in particular, were  
4  
5 229 small (Table 7).  
6  
7

8 230 In those with a record of a pain assessment, patients in the *High* cluster were more likely to have  
9  
10 231 recorded moderate or severe pain (70% vs 57% in the *Moderate* cluster and 64% in the *Low*  
11  
12 232 cluster). The same pattern was seen for functional limitation although differences between clusters  
13  
14  
15 233 were smaller (Table 7).  
16  
17

## 18 234 **Discussion**

19  
20 235 This study has identified four patterns of recorded primary care management of OA based on  
21  
22 236 previously identified quality indicators of care. Just over a third of patients consulting for clinical OA  
23  
24 237 had recorded care meeting the majority of quality indicators. Another third were not recorded as  
25  
26 238 having received or been considered for any of these quality indicators. Factors associated with  
27  
28 239 higher recorded quality of care included receiving an OA diagnosis, OA in the knee or hip rather  
29  
30 240 than foot or hand, lower total morbidity burden, multiple consultations for clinical OA, and initial  
31  
32 241 consultation with a clinician who was recorded as seeing more than the median number of OA  
33  
34 242 patients. Previous evidence has demonstrated that guidelines for treatment of OA within primary  
35  
36 243 care are not consistently adhered to [16-18]. The way in which receipt of different recommended  
37  
38 244 care processes for OA are grouped within patients has not previously been investigated. In our  
39  
40 245 study, 38% of the patients were recorded as having received a relatively large number of quality  
41  
42 246 indicators and could be regarded as a group achieving the closest to optimal care based on these  
43  
44 247 indicators (the *High* group). Care for members of two clusters (*Moderate* and *Low*) achieved some  
45  
46 248 quality indicators overall but can be distinguished by the fact that information, advice (exercise,  
47  
48 249 weight loss) and physiotherapy were more likely to be considered in the *Moderate* cluster than the  
49  
50 250 *Low*. A third of patients were in the *None* cluster which demonstrated the weakest recorded quality  
51  
52  
53  
54  
55  
56  
57  
58  
59  
60

1  
2  
3 251 of care with the majority of this group lacking recorded achievement or consideration of any  
4  
5 252 indicator. The patients in the cluster with the best recorded care (*High*) were also more likely to  
6  
7 253 receive other elements of care such as oral NSAIDs and referral for X-ray. NICE does not  
8  
9 254 recommend routine use of X-ray for OA diagnosis and suggests that opioids and oral NSAIDs should  
10  
11 255 be used only if topical NSAIDs and paracetamol do not relieve pain [3]. The greater use of these  
12  
13 256 approaches in the *High* cluster may reflect worse severity of OA and this cluster did have slightly  
14  
15 257 higher levels of clinician-recorded pain and functional limitation than those in the *Moderate* and  
16  
17 258 *Low* clusters. While one hypothesis may be that patients in the *High* cluster are given all possible  
18  
19 259 care elements, this is unlikely to be the case as differences between clusters on the non-quality  
20  
21 260 indicator elements of care were generally small, and most patients in the *High* cluster were not in  
22  
23 261 receipt of these non-recommended approaches.

24  
25  
26  
27  
28  
29 262 It is possible that the clinicians treating those in the *High* cluster were more engaged with, or more  
30  
31 263 confident in managing OA. Confidence in OA management could be associated with confidence in  
32  
33 264 OA diagnosis, which may explain the increased use of OA Read codes in these patients. Conversely,  
34  
35 265 where OA Read codes were not given there may have been uncertainty about both diagnosis and  
36  
37 266 management. Previous qualitative observational research of primary care consultations has  
38  
39 267 identified confusion about the construct of OA, with family doctors tending not to use the term  
40  
41 268 'osteoarthritis' with patients but instead, normalising symptoms [19]. A formal diagnosis of OA,  
42  
43 269 delivered explicitly, may be needed for holistic components of care such as patient education and  
44  
45 270 self-management support to be offered [5,19]. Patients with greater morbidity received a lower  
46  
47 271 recorded quality of care and this may be because they were (perhaps erroneously) considered less  
48  
49 272 suitable for non-pharmacological and relatively safe pharmacological options. It is also possible that  
50  
51 273 OA was given lower priority compared to their other problems [19,20]. Patients with foot (and to  
52  
53  
54  
55  
56  
57  
58  
59  
60

1  
2  
3 274 some extent hand) OA may also have been particularly susceptible to lower levels of recorded  
4  
5 275 quality of care and this site has been less well-investigated with regard to effective interventions  
6  
7 276 [21,22].  
8  
9  
10 277 This is the first study known to the authors which examines patterns of quality of care of chronic  
11  
12 278 conditions such as OA. Other analyses of recorded quality of care for OA have reported some  
13  
14  
15 279 influences on individual process measures. Broadbent et al. identified older age as being associated  
16  
17 280 with reduced information provision but increased initial use of paracetamol and, where an oral  
18  
19 281 NSAID was prescribed, greater first-use of ibuprofen or a COX-2 selective NSAID; female sex was  
20  
21 282 associated with increased information provision; severe OA was associated with increased pain and  
22  
23 283 function assessment in the previous year [23]. Unlike in this analysis, Min et al. identified an  
24  
25 284 association between multimorbidity (using a count of conditions) and better quality of care  
26  
27 285 amongst vulnerable elders, some of whom had OA [24].  
28  
29  
30  
31  
32 286 This study has important strengths. The study population was large and the practices were diverse  
33  
34 287 with respect to urbanisation, staffing, deprivation, and size of registered population, implying good  
35  
36 288 generalisability. Prescription recording is likely to be near-complete since most prescribing is  
37  
38 289 electronic and use of the e-template mitigates against missing data from patients using over-the-  
39  
40 290 counter pharmacological approaches. The e-template also facilitates enhanced data collection in  
41  
42 291 general practice without incurring biases such as social desirability. LCA uses probabilistic modelling  
43  
44 292 and finite mixture distributions to collect participants into clusters, which is a different method to  
45  
46 293 traditional clustering techniques (e.g. cluster analysis). Given this, LCA should produce a lower  
47  
48 294 misclassification rate and better statistical criteria for investigating model fit [25]. Whilst there was  
49  
50 295 variation in quality of care between clinicians and practices [5], clustering effects of patients within  
51  
52 296 clinicians was adjusted for through the multilevel model. There are some limitations in this analysis.  
53  
54  
55  
56  
57  
58  
59  
60

1  
2  
3 297 Due to the inherent nature of EHR studies, the data extracted is a function of both the individual  
4  
5 298 clinician's clinical and recording behaviours. It is therefore possible that some patients were  
6  
7 299 misclassified as the lack of a record of a care process does not conclusively demonstrate that it did  
8  
9 300 not occur. Compared to prescription recording, it is less certain how well-recorded referrals are.  
10  
11 301 However, despite the limitations of EHR data, the differences in levels of prescribed analgesia  
12  
13 302 between the clusters suggests there were real differences in care between the four clusters  
14  
15 303 identified. Conversely, patients may have been coded as receiving some elements of care without  
16  
17 304 this necessarily having been conducted in a comprehensive or meaningful way. Triangulation of  
18  
19 305 medical record indicators with patient-reported indicators would be needed to evaluate this  
20  
21 306 further. Our assumption that those without a weight recorded were considered for weight loss  
22  
23 307 advice was based on the increased likelihood of a weight recording if a patients appears overweight  
24  
25 308 [11] but will have over-estimated the proportion of patients considered for weight loss advice.  
26  
27 309 However, over 80% of patients did have a weight record. The association between multiple  
28  
29 310 consultations for OA and clusters with higher recorded quality of care may reflect greater  
30  
31 311 opportunity to provide and record care but may also have reflected a greater disease severity and  
32  
33 312 healthcare need. Although we considered comorbidities, previous research has identified that OA  
34  
35 313 may be discussed in complex consultations about multiple problems [19] and the length of time  
36  
37 314 discussing OA in a consultation would likely be an important influence on the level of recorded care.  
38  
39 315 It is also possible that those with recorded peripheral joint pain rather than recorded OA may not  
40  
41 316 have OA, particularly in the foot [26]. The e-template itself was previously found to be associated  
42  
43 317 with increased prescription of paracetamol and topical NSAIDs and so the patterns of care recorded  
44  
45 318 may not be generalisable to practices not using the e-template [5].  
46  
47  
48  
49  
50  
51  
52  
53  
54  
55  
56  
57  
58  
59  
60

1  
2  
3 319 Promotion of core interventions (information, exercise, and weight loss advice), alongside  
4  
5 320 appropriate use of the relatively safe pharmacological options, remains an important strategy in the  
6  
7 321 primary care management of OA but many patients receive few or none of these. This is particularly  
8  
9 322 true for patients with higher levels of morbidity, or hand or foot OA. Whilst there is substantial  
10  
11 323 variation in recorded care of OA, high quality care appears feasible given we found that over a third  
12  
13 324 of patients with OA were recorded as receiving most core recommendations. A lack of a systematic  
14  
15 325 approach to people with OA has previously been reported [27]. A structured annual review for  
16  
17 326 people with OA [28] as recommended by NICE [10] may help. This may possibly be nurse-led and  
18  
19 327 integrated, where appropriate, into a multimorbidity long-term condition review. However, causes  
20  
21 328 of variation in providing and recording of high quality care still need to be identified and  
22  
23 329 mechanisms need to be explored to ensure appropriate delivery of care to all patients.  
24  
25  
26  
27  
28

### 29 330 **Acknowledgements**

30  
31  
32 331 The authors would like to thank the OA Research Users' Group, NIHR West Midlands CRN Primary  
33  
34 332 Care, and the network, health informatics, study coordinator, research nurse, and administrative  
35  
36 333 staff at Keele University's Arthritis Research UK Primary Care Centre and Keele Clinical Trials Unit  
37  
38 334 for all their support and assistance with this study. The authors would like to give special thanks to  
39  
40 335 all of the staff and patients at the participating general practices, and the GP facilitators who  
41  
42 336 provided support to the general practices involved in the study.  
43  
44  
45  
46

### 47 337 **Author statement**

48  
49  
50 338 HJ and LB performed the analysis and drafted and revised the paper. KPJ and JJE developed the  
51  
52 339 analysis plan, cleaned the data, and drafted and revised the paper; KSD is PI for the study, led the  
53  
54  
55  
56  
57  
58  
59  
60

1  
2  
3 340 design of the MOSAICS study, and revised the paper; EC, ZP and AF were involved in the  
4  
5 341 interpretation of the findings and revised the paper. All authors have approved the final version.  
6  
7

## 8 342 **Funding**

9  
10

11 343 This paper presents independent research funded by the National Institute for Health Research  
12  
13 344 (NIHR) Programme Grant (RP-PG-0407-10386). The views expressed in this paper are those of the  
14  
15 345 authors and not necessarily those of the NHS, the NIHR or the Department of Health. This research  
16  
17 346 was also funded by the Arthritis Research UK Primary Care Centre grant (Grant Number 18139). HJ  
18  
19 347 and LB were funded by a NIHR Research Methods Training Fellowship. KSD is part-funded by the  
20  
21 348 NIHR Collaborations for Leadership in Applied Health Research and Care West Midlands and a  
22  
23 349 Knowledge Mobilisation Research Fellowship (KMRF-2014-03-002) from the NIHR. EC and JJE are  
24  
25 350 Academic Clinical Lecturers in Primary Care funded by the NIHR; JJE was previously supported by an  
26  
27 351 In-Practice Fellowship from the NIHR.  
28  
29  
30  
31  
32

## 33 352 **Competing interests**

34  
35

36 353 Prof. Jordan reports grants from National Institute for Health Research, grants from Arthritis  
37  
38 354 Research UK, during the conduct of the study. Prof. Dziedic reports grants from Arthritis Research  
39  
40 355 UK Centre in Primary Care grant, grants from National Institute for Health Research (NIHR)  
41  
42 356 Programme Grant (RP-PG-0407-10386), during the conduct of the study; grants from Knowledge  
43  
44 357 Mobilisation Research Fellowship (KMRF-2014-03-002), non-financial support from National  
45  
46 358 Institute of Health and Care Excellence, other from Bone and Joint Decade 2015 Conference Oslo,  
47  
48 359 non-financial support from National Institute of Health and Care Excellence Quality Standards,  
49  
50 360 grants from EIT-Health, other from Osteoarthritis Research Society International, outside the  
51  
52  
53  
54  
55  
56  
57  
58  
59  
60



1  
2  
3 361 submitted work; and Member of the NICE Osteoarthritis Guidelines Development Group CG 59  
4  
5 362 (2008) and CG 177 (2014). The other authors declare no competing interests.  
6  
7

8 363 **Data access statement**  
9

10  
11 364 The Centre has established data sharing arrangements to support joint publications and other  
12  
13 365 research collaborations. Applications for access to anonymised data from our research databases  
14  
15 366 are reviewed by the Centre's Data Custodian and Academic Proposal (DCAP) Committee and a  
16  
17 367 decision regarding access to the data is made subject to the NRES ethical approval first provided for  
18  
19 368 the study and to new analysis being proposed. Further information on our data sharing procedures  
20  
21 369 can be found on the Centre's website  
22  
23 370 (<http://www.keele.ac.uk/pchs/publications/datasharingresources/>) or by emailing the Centre's  
24  
25 371 data manager ([primarycare.datasharing@keele.ac.uk](mailto:primarycare.datasharing@keele.ac.uk)).  
26  
27  
28  
29  
30

31 372  
32  
33  
34  
35  
36  
37  
38  
39  
40  
41  
42  
43  
44  
45  
46  
47  
48  
49  
50  
51  
52  
53  
54  
55  
56  
57  
58  
59  
60

## 373 References

- 374 1. Jordan KP, Joud A, Bergknut C, et al. International comparisons of the consultation  
375 prevalence of musculoskeletal conditions using population-based healthcare data  
376 from England and Sweden. *Ann Rheum Dis* 2014;**73**(1):212-8.
- 377 2. Vos T, Flaxman AD, Naghavi M, et al. Years lived with disability (YLDs) for 1160  
378 sequelae of 289 diseases and injuries 1990-2010: a systematic analysis for the  
379 Global Burden of Disease Study 2010. *Lancet* 2012;**380**(9859):2163-96.
- 380 3. National Institute for Health & Care Excellence. NICE clinical guideline [CG177]  
381 Osteoarthritis: Care and management in adults. London: National Institute for Health  
382 & Care Excellence, 2014.
- 383 4. Hagen KB, Smedslund G, Osteras N, et al. Quality of Community-Based Osteoarthritis  
384 Care: A Systematic Review and Meta-Analysis. *Arthritis Care Res (Hoboken)*  
385 2016;**68**(10):1443-52.
- 386 5. Edwards JJ, Jordan KP, Peat G, et al. Quality of care for OA: the effect of a point-of-care  
387 consultation recording template. *Rheumatology (Oxford, England)* 2015;**54**(5):844-  
388 53.
- 389 6. Dziejczak KS, Healey EL, Porcheret M, et al. Implementing the NICE osteoarthritis  
390 guidelines: a mixed methods study and cluster randomised trial of a model  
391 osteoarthritis consultation in primary care--the Management of OsteoArthritis In  
392 Consultations (MOSAICS) study protocol. *Implement Sci* 2014;**9**(1):95.
- 393 7. Health and Social Care Information Centre. Read Codes. Secondary Read Codes 2017.  
394 <https://digital.nhs.uk/article/1104/Read-Codes>.
- 395 8. Edwards JJ, Khanna M, Jordan KP, et al. Quality indicators for the primary care of  
396 osteoarthritis: a systematic review. *Ann Rheum Dis* 2015;**74**(3):490-8.
- 397 9. National Institute for Health & Clinical Excellence. NICE clinical guideline [CG59]  
398 Osteoarthritis: the care and management of osteoarthritis in adults. London: National  
399 Institute for Health & Clinical Excellence, 2008.
- 400 10. National Institute for Health & Care Excellence. Quality standard for osteoarthritis (NICE  
401 quality standard 87). Secondary Quality standard for osteoarthritis (NICE quality  
402 standard 87) 2015. <https://www.nice.org.uk/guidance/qs87>.
- 403 11. Waring ME, Roberts MB, Parker DR, et al. Documentation and management of  
404 overweight and obesity in primary care. *Journal of the American Board of Family  
405 Medicine : JABFM* 2009;**22**(5):544-52.
- 406 12. Brilleman SL, Salisbury C. Comparing measures of multimorbidity to predict outcomes  
407 in primary care: a cross sectional study. *Fam Pract* 2013;**30**(2):172-8.
- 408 13. Magidson J, Vermunt JK. *Latent class models*. Thousand Oaks: Sage Publications,  
409 2004.
- 410 14. Schwarz G. Estimating the Dimension of a Model. *The Annals of Statistics*  
411 1978;**6**(2):461-4.
- 412 15. Clark DB, Jones BL, Wood DS, et al. Substance use disorder trajectory classes:  
413 diachronic integration of onset age, severity, and course. *Addictive behaviors*  
414 2006;**31**(6):995-1009.
- 415 16. Conrozier T, Marre JP, Payen-Champenois C, et al. National survey on the non-  
416 pharmacological modalities prescribed by French general practitioners in the  
417 treatment of lower limb (knee and hip) osteoarthritis. Adherence to the EULAR  
418 recommendations and factors influencing adherence. *Clin Exp Rheumatol*  
419 2008;**26**(5):793-8.
- 420 17. DeHaan MN, Guzman J, Bayley MT, et al. Knee osteoarthritis clinical practice  
421 guidelines -- how are we doing? *J Rheumatol* 2007;**34**(10):2099.

- 1  
2  
3 422 18. Denoed L, Mazieres B, Payen-Champenois C, et al. First line treatment of knee  
4 423 osteoarthritis in outpatients in France: adherence to the EULAR 2000  
5 424 recommendations and factors influencing adherence. *Ann Rheum Dis*  
6 425 2005;**64**(1):70-4.
- 7 426 19. Paskins Z, Sanders T, Croft PR, et al. The Identity Crisis of Osteoarthritis in General  
8 427 Practice: A Qualitative Study Using Video-Stimulated Recall. *Ann Fam Med*  
9 428 2015;**13**(6):537-44.
- 10 429 20. Coxon D, Frisher M, Jinks C, et al. The relative importance of perceived doctor's  
11 430 attitude on the decision to consult for symptomatic osteoarthritis: a choice-based  
12 431 conjoint analysis study. *BMJ Open* 2015;**5**(10):e009625.
- 13 432 21. Iagnocco A, Rizzo C, Gattamelata A, et al. Osteoarthritis of the foot: a review of the  
14 433 current state of knowledge. *Med Ultrason* 2013;**15**(1):35-40.
- 15 434 22. Conaghan PG, Kloppenburg M, Schett G, et al. Osteoarthritis research priorities: a  
16 435 report from a EULAR ad hoc expert committee. *Ann Rheum Dis* 2014;**73**(8):1442-5.
- 17 436 23. Broadbent J, Maisey S, Holland R, et al. Recorded quality of primary care for  
18 437 osteoarthritis: an observational study. *Br J Gen Pract* 2008;**58**(557):839-43.
- 19 438 24. Min LC, Wenger NS, Fung C, et al. Multimorbidity is associated with better quality of  
20 439 care among vulnerable elders. *Med Care* 2007;**45**(6):480-8.
- 21 440 25. Hougaard P. Frailty models for survival data. *Lifetime Data Anal* 1995;**1**(3):255-73.
- 22 441 26. Thomas MJ, Roddy E, Rathod T, et al. Clinical diagnosis of symptomatic midfoot  
23 442 osteoarthritis: cross-sectional findings from the Clinical Assessment Study of the  
24 443 Foot. *Osteoarthritis and cartilage / OARS, Osteoarthritis Research Society*  
25 444 2015;**23**(12):2094-101.
- 26 445 27. Rosemann T, Wensing M, Joest K, et al. Problems and needs for improving primary  
27 446 care of osteoarthritis patients: the views of patients, general practitioners and  
28 447 practice nurses. *BMC Musculoskelet Disord* 2006;**7**:48.
- 29 448 28. Healey EL, Main CJ, Ryan S, et al. A nurse-led clinic for patients consulting with  
30 449 osteoarthritis in general practice: development and impact of training in a cluster  
31 450 randomised controlled trial. *BMC Fam Pract* 2016;**17**(1):173.

32  
33  
34  
35 451  
36  
37  
38  
39  
40  
41  
42  
43  
44  
45  
46  
47  
48  
49  
50  
51  
52  
53  
54  
55  
56  
57  
58  
59  
60

1  
2  
3  
4  
5  
6  
7  
8  
9  
10  
11  
12  
13  
14  
15  
16  
17  
18  
19  
20  
21  
22  
23  
24  
25  
26  
27  
28  
29  
30  
31  
32  
33  
34  
35  
36  
37  
38  
39  
40  
41  
42  
43  
44  
45  
46  
47

**Table 1:** Seven quality Indicators and categories used for latent class analysis

| Quality Indicator                  | Categories                     | Definition                                                                                             |
|------------------------------------|--------------------------------|--------------------------------------------------------------------------------------------------------|
| 1. Pain assessed                   | Assessed                       | Recorded level of pain <sup>a</sup>                                                                    |
|                                    | Not assessed                   | No entry recorded <sup>a</sup>                                                                         |
| 2. Function assessed               | Assessed                       | Recorded level of function <sup>a</sup>                                                                |
|                                    | Not assessed                   | No entry recorded <sup>a</sup>                                                                         |
|                                    | Given                          | Recorded written or verbal <sup>a</sup>                                                                |
| 3. OA information                  | Considered, but not given      | Recorded not appropriate <sup>a</sup>                                                                  |
|                                    | Not considered                 | No entry recorded <sup>a</sup>                                                                         |
|                                    | Given                          | Recorded written or verbal <sup>a</sup>                                                                |
| 4. Exercise advice                 | Considered, but not given      | Recorded not appropriate <sup>a</sup>                                                                  |
|                                    | Not considered                 | No entry recorded <sup>a</sup>                                                                         |
|                                    | Given                          | Recorded written or verbal <sup>a</sup>                                                                |
| 5. Weight loss advice <sup>c</sup> | Considered, but not given      | Recorded not appropriate <sup>a</sup>                                                                  |
|                                    | Not considered                 | No entry recorded <sup>a</sup>                                                                         |
|                                    | Prescribed                     | Either drug prescribed <sup>b</sup>                                                                    |
| 6. Paracetamol or topical NSAID    | Considered, but not prescribed | Neither drug prescribed but recorded tried, offered, patient declined, or not appropriate <sup>a</sup> |
|                                    | Not considered                 | Neither drug prescribed, recorded unknown or no entry recorded for both drugs <sup>a</sup>             |
|                                    | Referred                       | Recorded referral <sup>b</sup>                                                                         |
| 7. Physiotherapy                   | Considered, but not referred   | No referral but recorded as offered, or not necessary or not appropriate <sup>a</sup>                  |
|                                    | Not considered                 | No referral, recorded not this time or no entry recorded <sup>a</sup>                                  |

<sup>a</sup>from e-template; <sup>b</sup> from routine records; <sup>c</sup> patients without a recorded BMI of  $\geq 25$  within the last 3 years were allocated to "Considered, but not given" category

**Table 2:** Latent class analysis goodness of fit statistics

| Number of clusters | BIC      | $\chi^2$ goodness of fit | Population (%) of smallest cluster | Range of mean PP across clusters | <i>n</i> (%) with PP<0.7 |
|--------------------|----------|--------------------------|------------------------------------|----------------------------------|--------------------------|
| 1                  | 20994.14 | 32978.08                 | 1724 (100)                         | 1.000                            | 0 (0)                    |
| 2                  | 15160.57 | 3332.77                  | 1071 (62)                          | 0.992, 0.987                     | 3 (<1)                   |
| 3                  | 14715.82 | 1727.74                  | 430 (25)                           | 0.906, 0.991                     | 138 (8)                  |
| 4                  | 14627.48 | 1522.28                  | 184 (11)                           | 0.848, 0.994                     | 157 (9)                  |
| 5                  | 14661.55 | 809.88                   | 142 (8)                            | 0.830, 0.993                     | 207 (12)                 |
| 6                  | 14699.79 | 733.23                   | 112 (6)                            | 0.754, 0.996                     | 257 (15)                 |
| 7                  | 14771.09 | 818.78                   | 22 (1)                             | 0.701, 0.996                     | 267 (15)                 |

BIC: Bayes Information Criterion; PP: posterior probability

**Table 3:** Conditional item response probabilities for the quality indicators for each cluster

|                                                          |                            | Overall<br><i>n</i> (%) | Cluster                                 |                                             |                                        |                                         |
|----------------------------------------------------------|----------------------------|-------------------------|-----------------------------------------|---------------------------------------------|----------------------------------------|-----------------------------------------|
| Quality Indicators                                       |                            |                         | <i>High</i><br>( <i>n</i> =659,<br>38%) | <i>Moderate</i><br>( <i>n</i> =184,<br>11%) | <i>Low</i><br>( <i>n</i> =286,<br>17%) | <i>None</i><br>( <i>n</i> =595,<br>35%) |
| Pain<br>Assessment                                       | Assessed                   | 1092 (63)               | 0.978                                   | 0.961                                       | 0.922                                  | 0.014                                   |
|                                                          | Not Assessed               | 632 (37)                | 0.022                                   | 0.039                                       | 0.078                                  | 0.987                                   |
| Function<br>Assessment                                   | Assessed                   | 1070 (62)               | 0.981                                   | 0.955                                       | 0.873                                  | 0.000                                   |
|                                                          | Not Assessed               | 654 (38)                | 0.019                                   | 0.045                                       | 0.127                                  | 1.000                                   |
| OA<br>Information                                        | Given                      | 764 (44)                | 0.930                                   | 0.463                                       | 0.319                                  | 0.001                                   |
|                                                          | Considered, Not Given      | 85 (5)                  | 0.009                                   | 0.330                                       | 0.011                                  | 0.000                                   |
|                                                          | Not Considered             | 875 (51)                | 0.062                                   | 0.207                                       | 0.670                                  | 1.000                                   |
| Exercise<br>Advice                                       | Given                      | 768 (45)                | 0.994                                   | 0.417                                       | 0.237                                  | 0.000                                   |
|                                                          | Considered, Not Given      | 96 (6)                  | 0.007                                   | 0.313                                       | 0.067                                  | 0.000                                   |
|                                                          | Not Considered             | 860 (50)                | 0.000                                   | 0.270                                       | 0.696                                  | 1.000                                   |
| Weight<br>Advice                                         | Given                      | 536 (31)                | 0.593                                   | 0.115                                       | 0.089                                  | 0.000                                   |
|                                                          | Considered, Not Given      | 153 (9)                 | 0.298                                   | 0.733                                       | 0.347                                  | 0.441                                   |
|                                                          | Not Considered             | 1035 (60)               | 0.109                                   | 0.152                                       | 0.564                                  | 0.559                                   |
| Topical<br>NSAID/<br>paracetamol                         | Prescribed                 | 609 (35)                | 0.476                                   | 0.273                                       | 0.394                                  | 0.239                                   |
|                                                          | Considered, Not Prescribed | 570 (33)                | 0.496                                   | 0.641                                       | 0.406                                  | 0.004                                   |
|                                                          | Not Considered             | 545 (32)                | 0.028                                   | 0.086                                       | 0.200                                  | 0.757                                   |
| Physiotherapy                                            | Referred                   | 124 (7)                 | 0.111                                   | 0.037                                       | 0.101                                  | 0.032                                   |
|                                                          | Considered, Not Referred   | 532 (31)                | 0.559                                   | 0.732                                       | 0.080                                  | 0.000                                   |
|                                                          | Not Considered             | 1068 (62)               | 0.330                                   | 0.230                                       | 0.819                                  | 0.968                                   |
| Median count (IQR)<br>Assessed/prescribed/given/referred |                            |                         | 5 (4, 6)                                | 3 (2, 3)                                    | 3 (2, 3)                               | 0 (0, 1)                                |
| Median count (IQR) Considered                            |                            |                         | 1 (1, 2)                                | 3 (2, 4)                                    | 1 (0, 1)                               | 0 (0, 1)                                |

**Table 4:** Expected number compared to observed for each category of indicators, by cluster

| Quality Indicators           |                                         | Cluster           |     |     |                       |     |     |                  |     |     |                   |     |    |
|------------------------------|-----------------------------------------|-------------------|-----|-----|-----------------------|-----|-----|------------------|-----|-----|-------------------|-----|----|
|                              |                                         | High (n=659, 38%) |     |     | Moderate (n=184, 11%) |     |     | Low (n=286, 17%) |     |     | None (n=595, 35%) |     |    |
|                              |                                         | E                 | O   | Δ   | E                     | O   | Δ   | E                | O   | Δ   | E                 | O   | Δ  |
| Pain Assessment              | Assessed (n=1092, 63%)                  | 645               | 645 | 0   | 177                   | 177 | 0   | 264              | 263 | 1   | 8                 | 7   | 1  |
|                              | Not assessed (n=632, 37%)               | 14                | 14  | 0   | 7                     | 7   | 0   | 22               | 23  | -1  | 587               | 588 | -1 |
| Function Assessment          | Assessed (n=1070, 62%)                  | 646               | 646 | 0   | 176                   | 174 | 2   | 250              | 250 | 0   | 0                 | 0   | 0  |
|                              | Not assessed (n=655, 38%)               | 13                | 13  | 0   | 8                     | 10  | -2  | 36               | 36  | 0   | 595               | 595 | 0  |
| OA Information               | Given (n=764, 44%)                      | 613               | 620 | -7  | 85                    | 59  | 26  | 91               | 85  | 6   | 0                 | 0   | 0  |
|                              | Considered, not given (n=85, 5%)        | 6                 | 3   | 3   | 61                    | 81  | -20 | 3                | 1   | 2   | 0                 | 0   | 0  |
|                              | Not considered (n=875, 51%)             | 41                | 36  | 5   | 38                    | 44  | -6  | 192              | 200 | -8  | 595               | 595 | 0  |
| Exercise Advice              | Given (n=768, 45%)                      | 655               | 658 | -3  | 77                    | 53  | 24  | 68               | 57  | 11  | 0                 | 0   | 0  |
|                              | Considered, not given (n=96, 6%)        | 4                 | 1   | 3   | 58                    | 77  | -19 | 19               | 18  | 1   | 0                 | 0   | 0  |
|                              | Not considered (n=860, 50%)             | 0                 | 0   | 0   | 50                    | 54  | -4  | 199              | 211 | -12 | 595               | 595 | 0  |
| Weight Advice                | Given (n=536, 31%)                      | 391               | 370 | 21  | 21                    | 20  | 1   | 26               | 22  | 4   | 0                 | 0   | 0  |
|                              | Considered, not given (n= 153, 9%)      | 196               | 213 | -17 | 135                   | 140 | -5  | 99               | 99  | 0   | 262               | 262 | 0  |
|                              | Not considered (n=1035, 60%)            | 72                | 76  | -4  | 28                    | 24  | 4   | 161              | 165 | -4  | 333               | 333 | 0  |
| Topical NSAID or paracetamol | Prescribed (n=609, 35%)                 | 314               | 311 | 3   | 50                    | 47  | 3   | 113              | 111 | 2   | 142               | 140 | 2  |
|                              | Considered, not prescribed (n=570, 33%) | 327               | 330 | -3  | 118                   | 119 | -1  | 116              | 118 | -2  | 2                 | 3   | -1 |
|                              | Not considered (n=545, 32%)             | 18                | 18  | 0   | 16                    | 18  | -2  | 57               | 57  | 0   | 450               | 452 | -2 |
| Physiotherapy                | Referred (n=124, 7%)                    | 73                | 69  | 4   | 7                     | 6   | 1   | 29               | 30  | -1  | 19                | 19  | 0  |
|                              | Considered, not referred (n=532, 31%)   | 369               | 371 | -2  | 135                   | 147 | -12 | 23               | 14  | 9   | 0                 | 0   | 0  |
|                              | Not considered (n=1068, 62%)            | 218               | 219 | -1  | 42                    | 31  | 11  | 234              | 242 | -8  | 576               | 576 | 0  |

E: expected number; O: observed number; Δ: difference

**Table 5:** Patient and clinician characteristics for each cluster

|                                                   | Total <i>n</i><br>(%) | Cluster                         |                                     |                                |                                 |  |
|---------------------------------------------------|-----------------------|---------------------------------|-------------------------------------|--------------------------------|---------------------------------|--|
|                                                   |                       | <i>High</i><br>( <i>n</i> =659) | <i>Moderate</i><br>( <i>n</i> =184) | <i>Low</i><br>( <i>n</i> =286) | <i>None</i><br>( <i>n</i> =595) |  |
| <b>Patient factors</b>                            |                       |                                 |                                     |                                |                                 |  |
| <b>Age</b>                                        |                       |                                 |                                     |                                |                                 |  |
| 45-64                                             | 817                   | 277 (34)                        | 109 (13)                            | 293 (43)                       | 138 (17)                        |  |
| 65-74                                             | 442                   | 213 (48)                        | 20 (5)                              | 144 (33)                       | 65 (15)                         |  |
| 75-84                                             | 349                   | 133 (38)                        | 35 (10)                             | 116 (33)                       | 65 (19)                         |  |
| 85+                                               | 116                   | 36 (31)                         | 20 (17)                             | 42 (36)                        | 18 (6)                          |  |
| <b>Gender</b>                                     |                       |                                 |                                     |                                |                                 |  |
| Male                                              | 710                   | 286 (40)                        | 68 (10)                             | 113 (16)                       | 243 (34)                        |  |
| Female                                            | 1014                  | 373 (37)                        | 116 (11)                            | 173 (17)                       | 352 (35)                        |  |
| <b>BMI category:</b>                              |                       |                                 |                                     |                                |                                 |  |
| Normal                                            | 315                   | 111 (35)                        | 54 (17)                             | 48 (15)                        | 102 (32)                        |  |
| Overweight                                        | 1080                  | 471 (44)                        | 83 (8)                              | 193 (18)                       | 333 (31)                        |  |
| Not recorded                                      | 329                   | 77 (23)                         | 47 (14)                             | 45 (14)                        | 160 (49)                        |  |
| <b>Diagnosis</b>                                  |                       |                                 |                                     |                                |                                 |  |
| Recorded with joint pain only                     | 1142                  | 366 (32)                        | 148 (13)                            | 207 (18)                       | 421 (37)                        |  |
| OA diagnosis                                      | 582                   | 293 (50)                        | 36 (6)                              | 79 (14)                        | 174 (30)                        |  |
| <b>Site of OA:</b>                                |                       |                                 |                                     |                                |                                 |  |
| Knee                                              | 855                   | 359 (42)                        | 80 (9)                              | 149 (17)                       | 267 (31)                        |  |
| Hip                                               | 363                   | 135 (37)                        | 41 (11)                             | 68 (19)                        | 119 (33)                        |  |
| Foot                                              | 125                   | 30 (24)                         | 15 (12)                             | 10 (8)                         | 70 (56)                         |  |
| Hand                                              | 152                   | 33 (22)                         | 25 (16)                             | 31 (20)                        | 63 (41)                         |  |
| Unspecified                                       | 99                    | 30 (30)                         | 8 (8)                               | 16 (16)                        | 45 (46)                         |  |
| Multiple                                          | 130                   | 72 (55)                         | 15 (12)                             | 12 (9)                         | 31 (24)                         |  |
| <b>Morbidity load<sup>a</sup>:</b>                |                       |                                 |                                     |                                |                                 |  |
| BNF count 0-4                                     | 485                   | 156 (32)                        | 68 (14)                             | 89 (18)                        | 172 (36)                        |  |
| 5-9                                               | 578                   | 240 (42)                        | 56 (10)                             | 99 (17)                        | 183 (32)                        |  |
| 10+                                               | 661                   | 263 (40)                        | 60 (9)                              | 98 (15)                        | 240 (36)                        |  |
| <b>Number of OA consultations<sup>b</sup>:</b>    |                       |                                 |                                     |                                |                                 |  |
| Multiple                                          | 532                   | 250 (47)                        | 63 (12)                             | 99 (19)                        | 120 (23)                        |  |
| Single                                            | 1192                  | 409 (34)                        | 121 (10)                            | 187 (16)                       | 475 (40)                        |  |
| Median (IQR) no. of OA consultations <sup>b</sup> | 1 (0, 1)              | 1 (1, 2)                        | 1 (1, 2)                            | 1 (1, 2)                       | 1 (1, 1)                        |  |
| <b>Consulter status:</b>                          |                       |                                 |                                     |                                |                                 |  |
| Repeat                                            | 566                   | 232 (41)                        | 53 (9)                              | 84 (15)                        | 197 (35)                        |  |
| New <sup>c</sup>                                  | 1158                  | 427 (37)                        | 131 (11)                            | 202 (17)                       | 398 (34)                        |  |
| <b>Clinician factors</b>                          |                       |                                 |                                     |                                |                                 |  |
| <b>Clinician OA workload<sup>b</sup>:</b>         |                       |                                 |                                     |                                |                                 |  |
| Below the median                                  | 197                   | 41 (21)                         | 16 (8)                              | 36 (18)                        | 104 (53)                        |  |
| Above the median                                  | 1527                  | 618 (41)                        | 168 (11)                            | 250 (16)                       | 491 (32)                        |  |

<sup>a</sup> Number of BNF subchapters from which prescription was made in previous 12 months; <sup>b</sup> during six month period; <sup>c</sup> no clinical OA consultations within the previous 12 months



**Table 6:** Associations of patient and clinician characteristics with cluster membership

| <i>n</i> = 1724                               | <i>High vs None</i><br>RRR <sup>a</sup> (95% CI) | <i>Moderate vs None</i><br>RRR <sup>a</sup> (95% CI) | <i>Low vs None</i><br>RRR <sup>a</sup> (95% CI) |
|-----------------------------------------------|--------------------------------------------------|------------------------------------------------------|-------------------------------------------------|
| <b>Patient factors</b>                        |                                                  |                                                      |                                                 |
| <b>Age</b>                                    |                                                  |                                                      |                                                 |
| 45-64                                         | 1                                                | 1                                                    | 1                                               |
| 65-74                                         | 1.41 (1.07, 1.84)                                | 0.45 (0.27, 0.74)                                    | 0.97 (0.69, 1.37)                               |
| 75-84                                         | 1.13 (0.83, 1.52)                                | 1.02 (0.65, 1.60)                                    | 1.42 (0.99, 2.05)                               |
| 85+                                           | 0.91 (0.56, 1.47)                                | 1.56 (0.85, 2.89)                                    | 1.24 (0.69, 2.23)                               |
| <b>Gender</b>                                 |                                                  |                                                      |                                                 |
| Male                                          | 1                                                | 1                                                    | 1                                               |
| Female                                        | 0.86 (0.69, 1.07)                                | 1.03 (0.75, 1.43)                                    | 1.04 (0.80, 1.36)                               |
| <b>BMI category</b>                           |                                                  |                                                      |                                                 |
| Normal                                        | 1                                                | 1                                                    | 1                                               |
| Overweight                                    | 1.20 (0.91, 1.60)                                | 0.57 (0.39, 0.85)                                    | 1.33 (0.93, 1.90)                               |
| Not recorded                                  | 0.39 (0.27, 0.56)                                | 0.52 (0.33, 0.81)                                    | 0.52 (0.33, 0.82)                               |
| <b>Diagnosis</b>                              |                                                  |                                                      |                                                 |
| Recorded with joint pain only                 | 1                                                | 1                                                    | 1                                               |
| OA diagnosis                                  | 1.81 (1.41, 2.32)                                | 0.55 (0.35, 0.85)                                    | 0.93 (0.68, 1.29)                               |
| <b>Site of OA</b>                             |                                                  |                                                      |                                                 |
| Knee                                          | 1                                                | 1                                                    | 1                                               |
| Hip                                           | 0.86 (0.66, 1.14)                                | 1.14 (0.76, 1.71)                                    | 1.04 (0.75, 1.44)                               |
| Foot                                          | 0.38 (0.24, 0.60)                                | 0.73 (0.39, 1.36)                                    | 0.25 (0.13, 0.51)                               |
| Hand                                          | 0.45 (0.30, 0.70)                                | 1.18 (0.70, 1.98)                                    | 0.88 (0.56, 1.39)                               |
| Unspecified                                   | 0.48 (0.30, 0.80)                                | 0.85 (0.38, 1.90)                                    | 0.74 (0.41, 1.34)                               |
| Multiple                                      | 1.13 (0.75, 1.74)                                | 1.89 (0.99, 3.59)                                    | 0.65 (0.34, 1.24)                               |
| <b>Morbidity load<sup>b</sup>:</b>            |                                                  |                                                      |                                                 |
| BNF count 0-4                                 | 1                                                | 1                                                    | 1                                               |
| 5-9                                           | 0.95 (0.71, 1.26)                                | 0.74 (0.50, 1.11)                                    | 0.75 (0.54, 1.06)                               |
| 10+                                           | 0.64 (0.47, 0.87)                                | 0.55 (0.35, 0.86)                                    | 0.50 (0.35, 0.73)                               |
| <b>Number of OA consultations<sup>c</sup></b> |                                                  |                                                      |                                                 |
| Multiple                                      | 1                                                | 1                                                    | 1                                               |
| Single                                        | 0.43 (0.34, 0.54)                                | 0.47 (0.33, 0.66)                                    | 0.45 (0.34, 0.60)                               |
| <b>Consulter status</b>                       |                                                  |                                                      |                                                 |
| Repeat                                        | 1                                                | 1                                                    | 1                                               |
| New <sup>d</sup>                              | 1.12 (0.89, 1.41)                                | 1.09 (0.76, 1.55)                                    | 1.18 (0.88, 1.59)                               |
| <b>Clinician factors</b>                      |                                                  |                                                      |                                                 |
| <b>Clinician OA workload<sup>c</sup></b>      |                                                  |                                                      |                                                 |
| Below the median                              | 1                                                | 1                                                    | 1                                               |
| Above the median                              | 2.90 (1.98, 4.25)                                | 2.32 (1.33, 4.03)                                    | 1.46 (0.98, 2.18)                               |

<sup>a</sup> Relative risk ratio from multilevel multinomial regression (patients within initial clinician seen) adjusted for all presented covariates, *None* cluster is reference; <sup>b</sup> Number of BNF subchapters from which prescription was made in previous 12 months; <sup>c</sup> during six month period; <sup>d</sup> no clinical OA consultations within the previous 12 month

**Table 7:** Use of management processes other than those used as quality indicators, and recorded severity of pain and functional limitation, by cluster

| <i>n</i> (column %)           | Cluster               |                          |                              |                         |                          | <i>p</i> -value <sup>a</sup> |
|-------------------------------|-----------------------|--------------------------|------------------------------|-------------------------|--------------------------|------------------------------|
|                               | Total<br><i>n</i> (%) | High<br>( <i>n</i> =659) | Moderate<br>( <i>n</i> =184) | Low<br>( <i>n</i> =286) | None<br>( <i>n</i> =595) |                              |
| Opioid Prescribed             | 557 (33)              | 236 (36)                 | 54 (29)                      | 94 (33)                 | 173 (29)                 | 0.06                         |
| Oral NSAID Prescribed         | 284 (17)              | 130 (20)                 | 21 (11)                      | 49 (17)                 | 84 (14)                  | 0.01                         |
| X-ray Requested               | 263 (15)              | 142 (22)                 | 30 (16)                      | 52 (18)                 | 39 (7)                   | <0.01                        |
| <i>n</i> with pain record     | 1092                  | 645                      | 177                          | 263                     | 7                        | 0.001 <sup>b</sup>           |
| No pain                       | 16 (1)                | 4 (<1)                   | 7 (4)                        | 4 (2)                   | 1                        |                              |
| Mild pain                     | 348 (32)              | 187 (29)                 | 69 (39)                      | 91 (35)                 | 1                        |                              |
| Moderate pain                 | 582 (53)              | 357 (55)                 | 84 (47)                      | 136 (52)                | 5                        |                              |
| Severe pain                   | 146 (13)              | 97 (15)                  | 17 (10)                      | 32 (12)                 | 0                        |                              |
| <i>n</i> with function record | 1070                  | 646                      | 174                          | 250                     | 0                        | 0.004 <sup>b</sup>           |
| No limitation                 | 101 (9)               | 46 (7)                   | 29 (16)                      | 26 (10)                 | 0                        |                              |
| Mild limitation               | 456 (43)              | 276 (43)                 | 73 (42)                      | 107 (43)                | 0                        |                              |
| Moderate limitation           | 427 (40)              | 277 (43)                 | 57 (33)                      | 93 (37)                 | 0                        |                              |
| Severe limitation             | 86 (8)                | 47 (7)                   | 15 (9)                       | 24 (10)                 | 0                        |                              |

<sup>a</sup> $\chi^2$  test, <sup>b</sup> excluding *None* cluster

## STROBE Statement—checklist of items that should be included in reports of observational studies

|                              | Item No | Recommendation                                                                                                                                                                                                                                                                                                                                                                                                                                                         | Page                                                                           |
|------------------------------|---------|------------------------------------------------------------------------------------------------------------------------------------------------------------------------------------------------------------------------------------------------------------------------------------------------------------------------------------------------------------------------------------------------------------------------------------------------------------------------|--------------------------------------------------------------------------------|
| <b>Title and abstract</b>    | 1       | (a) Indicate the study's design with a commonly used term in the title or the abstract                                                                                                                                                                                                                                                                                                                                                                                 | Title upload                                                                   |
|                              |         | (b) Provide in the abstract an informative and balanced summary of what was done and what was found                                                                                                                                                                                                                                                                                                                                                                    | Abstract upload                                                                |
| <b>Introduction</b>          |         |                                                                                                                                                                                                                                                                                                                                                                                                                                                                        |                                                                                |
| Background/rationale         | 2       | Explain the scientific background and rationale for the investigation being reported                                                                                                                                                                                                                                                                                                                                                                                   | 2                                                                              |
| Objectives                   | 3       | State specific objectives, including any prespecified hypotheses                                                                                                                                                                                                                                                                                                                                                                                                       | 2                                                                              |
| <b>Methods</b>               |         |                                                                                                                                                                                                                                                                                                                                                                                                                                                                        |                                                                                |
| Study design                 | 4       | Present key elements of study design early in the paper                                                                                                                                                                                                                                                                                                                                                                                                                | 2-3                                                                            |
| Setting                      | 5       | Describe the setting, locations, and relevant dates, including periods of recruitment, exposure, follow-up, and data collection                                                                                                                                                                                                                                                                                                                                        | 3                                                                              |
| Participants                 | 6       | (a) <i>Cohort study</i> —Give the eligibility criteria, and the sources and methods of selection of participants. Describe methods of follow-up<br><i>Case-control study</i> —Give the eligibility criteria, and the sources and methods of case ascertainment and control selection. Give the rationale for the choice of cases and controls<br><i>Cross-sectional study</i> —Give the eligibility criteria, and the sources and methods of selection of participants | 3                                                                              |
|                              |         | (b) <i>Cohort study</i> —For matched studies, give matching criteria and number of exposed and unexposed<br><i>Case-control study</i> —For matched studies, give matching criteria and the number of controls per case                                                                                                                                                                                                                                                 | N/A                                                                            |
| Variables                    | 7       | Clearly define all outcomes, exposures, predictors, potential confounders, and effect modifiers. Give diagnostic criteria, if applicable                                                                                                                                                                                                                                                                                                                               | 3-5                                                                            |
| Data sources/<br>measurement | 8*      | For each variable of interest, give sources of data and details of methods of assessment (measurement). Describe comparability of assessment methods if there is more than one group                                                                                                                                                                                                                                                                                   | 3-5                                                                            |
| Bias                         | 9       | Describe any efforts to address potential sources of bias                                                                                                                                                                                                                                                                                                                                                                                                              | 3                                                                              |
| Study size                   | 10      | Explain how the study size was arrived at                                                                                                                                                                                                                                                                                                                                                                                                                              | N/A (sample size calculation was for the clinical outcomes reported elsewhere) |
| Quantitative variables       | 11      | Explain how quantitative variables were handled in the analyses. If applicable, describe which groupings were chosen and why                                                                                                                                                                                                                                                                                                                                           | 4-5                                                                            |
| Statistical methods          | 12      | (a) Describe all statistical methods, including those used                                                                                                                                                                                                                                                                                                                                                                                                             | 5-6                                                                            |

1  
2 to control for confounding

3 (b) Describe any methods used to examine subgroups N/A  
4 and interactions

5 (c) Explain how missing data were addressed 4

6 (d) *Cohort study*—If applicable, explain how loss to N/A  
7 follow-up was addressed

8 *Case-control study*—If applicable, explain how  
9 matching of cases and controls was addressed

10 *Cross-sectional study*—If applicable, describe analytical  
11 methods taking account of sampling strategy

12  
13  
14 (e) Describe any sensitivity analyses N/A

15 Continued on next page

16  
17  
18  
19  
20  
21  
22  
23  
24  
25  
26  
27  
28  
29  
30  
31  
32  
33  
34  
35  
36  
37  
38  
39  
40  
41  
42  
43  
44  
45  
46  
47  
48  
49  
50  
51  
52  
53  
54  
55  
56  
57  
58  
59  
60

For peer review only

| <b>Results</b>           |     | <b>Page</b>                                                                                                                                                                                                  |            |
|--------------------------|-----|--------------------------------------------------------------------------------------------------------------------------------------------------------------------------------------------------------------|------------|
| Participants             | 13* | (a) Report numbers of individuals at each stage of study—eg numbers potentially eligible, examined for eligibility, confirmed eligible, included in the study, completing follow-up, and analysed            | 6          |
|                          |     | (b) Give reasons for non-participation at each stage                                                                                                                                                         | N/A        |
|                          |     | (c) Consider use of a flow diagram                                                                                                                                                                           | N/A        |
| Descriptive data         | 14* | (a) Give characteristics of study participants (eg demographic, clinical, social) and information on exposures and potential confounders                                                                     | Table 4    |
|                          |     | (b) Indicate number of participants with missing data for each variable of interest                                                                                                                          | N/A        |
|                          |     | (c) <i>Cohort study</i> —Summarise follow-up time (eg, average and total amount)                                                                                                                             | N/A        |
| Outcome data             | 15* | <i>Cohort study</i> —Report numbers of outcome events or summary measures over time                                                                                                                          | N/A        |
|                          |     | <i>Case-control study</i> —Report numbers in each exposure category, or summary measures of exposure                                                                                                         | N/A        |
|                          |     | <i>Cross-sectional study</i> —Report numbers of outcome events or summary measures                                                                                                                           | Table 3    |
| Main results             | 16  | (a) Give unadjusted estimates and, if applicable, confounder-adjusted estimates and their precision (eg, 95% confidence interval). Make clear which confounders were adjusted for and why they were included | Table 5    |
|                          |     | (b) Report category boundaries when continuous variables were categorized                                                                                                                                    | Table 4, 5 |
|                          |     | (c) If relevant, consider translating estimates of relative risk into absolute risk for a meaningful time period                                                                                             | N/A        |
| Other analyses           | 17  | Report other analyses done—eg analyses of subgroups and interactions, and sensitivity analyses                                                                                                               | N/A        |
| <b>Discussion</b>        |     |                                                                                                                                                                                                              |            |
| Key results              | 18  | Summarise key results with reference to study objectives                                                                                                                                                     | 8-9        |
| Limitations              | 19  | Discuss limitations of the study, taking into account sources of potential bias or imprecision. Discuss both direction and magnitude of any potential bias                                                   | 11         |
| Interpretation           | 20  | Give a cautious overall interpretation of results considering objectives, limitations, multiplicity of analyses, results from similar studies, and other relevant evidence                                   | 12         |
| Generalisability         | 21  | Discuss the generalisability (external validity) of the study results                                                                                                                                        | 12         |
| <b>Other information</b> |     |                                                                                                                                                                                                              |            |
| Funding                  | 22  | Give the source of funding and the role of the funders for the present study and, if applicable, for the original study on which the present article is based                                                | 13         |

\*Give information separately for cases and controls in case-control studies and, if applicable, for exposed and unexposed groups in cohort and cross-sectional studies.

**Note:** An Explanation and Elaboration article discusses each checklist item and gives methodological background and published examples of transparent reporting. The STROBE checklist is best used in conjunction with this article (freely available on the Web sites of PLoS Medicine at <http://www.plosmedicine.org/>, Annals of Internal Medicine at <http://www.annals.org/>, and Epidemiology at <http://www.epidem.com/>). Information on the STROBE Initiative is available at [www.strobe-statement.org](http://www.strobe-statement.org).
